# Supplementary material
Source: ML conference proceedings conference paper supplement (https://openreview.net/forum?id=mxzIrQIOGIK)
Supplement: supplementary_material [file attachment]

---

# Supplementary Materials for Multi-Objective Online Learning

---

Anonymous Author(s)

Affiliation

Address

email

1 Supplementary materials are organized as follows. Appendix A reviews related work. Appendix B  
2 validates the correctness of our definition of PSG. Appendix C discusses the physical meaning of our  
3 proposed multi-objective static regret. Appendix D provides more details of DR-OMMD, including  
4 a discussion on the lazy version of mirror descent and how to efficiently compute the composition  
5 weights for the min-regularized-norm solver. Appendix E proves the tightness of DR-OMMD's  
6 bounds and gives a more general dynamic regret bound for arbitrary temporal variability. Appendix  
7 F supplements more experimental results, including more results of adaptive regularization and  
8 an addition experiment in the online non-convex setting. In Appendix F.4, we discuss how to set  
9 hyperparameters when  $V_T$  is unknown in the dynamic setting. Appendix G, H, and I provide detailed  
10 proofs of all theoretical claims in this work. Note that in Appendix D we fix a typo in the solution of  
11 min-regularized-norm (line 277), and in Appendix E we fix a typo in the remark below Theorem 4.4  
12 (line 304); both typos do not affect the following parts.

## 13 A Related Work

14 In this section, we review previous work in three related fields, i.e., online learning, multi-objective  
15 optimization, and multi-objective multi-armed bandits.

### 16 A.1 Online Learning

17 Online learning aims to make sequential predictions for streaming data. Please refer to the introduction  
18 books [13, 23] for more background knowledges.

19 Most of the previous works on online learning are conducted in the single-objective setting. As far as  
20 we are concerned, there are only two lines of work concerning multi-objective learning. The first line  
21 of works provides a multi-objective perspective of the prediction-with-expert-advice (PEA) problem  
22 [16, 17]. Specifically, they view each individual expert as a multi-objective criterion, and characterize  
23 the Pareto optimal trade-offs among different experts. These works have two main distinctions from  
24 our proposed MO-OCO. First, they are still built upon the original PEA problem where the payoff of  
25 each expert (or decision) is a scalar, while we focus on vectoral payoffs. Second, their framework  
26 is restricted to an absolute loss game, whereas our framework is general and can be applied to any  
27 coordinate-wise convex loss functions.

28 The second line of work studies online learning with vectoral payoffs via Blackwell approachability  
29 [4, 21, 1]. In their framework, the learner is given a target set  $\mathcal{T} \subset \mathbb{R}^m$  and its goal is to generate  
30 decisions  $\{x_t\}_{t=1}^T$  to minimize the distance between the average loss  $\frac{1}{T} \sum_{t=1}^T l_t(x_t)$  and the target  
31 set  $\mathcal{T}$ . There are two major differences between Blackwell approachability and our proposed MO-  
32 OCO: previous works on Blackwell approachability are zero-order methods and the target set  $\mathcal{T}$  is  
33 often known beforehand (also see the discussion in [5]), while in MO-OCO we intend to develop a  
34 first-order method to reach the unknown Pareto front.

## 35 A.2 Multi-Objective Optimization

36 Multi-objective optimization aims to optimize multiple objectives concurrently. Most of the previous  
 37 works on multi-objective optimization are conducted in the offline setting, including the batch  
 38 optimization setting [10, 19] and the stochastic optimization setting [27, 18, 32, 8, 15]. These  
 39 methods are based on gradient composition, and have shown very promising results in multi-task  
 40 learning applications.

41 Despite the existence of previous works on multi-objective optimization, as the first work of multi-  
 42 objective optimization in the OCO setting, our work is largely different from them in three aspects.  
 43 First, we contribute the first formal framework of multi-objective online convex optimization. In  
 44 particular, our framework is based on a novel equivalent transformation of the PSG metric, which is  
 45 intrinsically different from previous offline optimization frameworks. Second, we provide a showcase  
 46 in which a commonly used method in the offline setting, namely min-norm [10, 27], fail to attain  
 47 sublinear regret in online setting. Our proposed min-regularized-norm is a novel design when tailoring  
 48 offline methods to the online setting. Third, the regret analysis of multi-objective online learning is  
 49 intrinsically different from the convergence analysis in the offline setting [32].

## 50 A.3 Multi-Objective Multi-Armed Bandits

51 Another branch of related works study multi-objective optimization in the multi-armed bandits setting  
 52 [5, 29, 30, 20, 9]. Among these works, the most relevant one to ours is [30], which introduces the  
 53 Pareto suboptimality gap (PSG) metric to characterize the multi-objective regret in the bandits setting,  
 54 and proposes a zero-order zooming algorithm to minimize the regret.

55 In this work, our regret definition also utilizes the PSG metric [30]. However, as the first study  
 56 of multi-objective optimization in the OCO setting, our work is intrinsically different from these  
 57 previous works in the following aspects. First, as PSG is a zero-order metric, we perform a novel  
 58 equivalent transformation, making it amenable to the OCO setting. Second, our proposed algorithm  
 59 is a first-order multiple gradient algorithm, whose design principles are completely distinct from  
 60 zero-order algorithms. For example, the concept of the stability of composite weights does not even  
 61 exist in the design of previous zero-order methods for multi-objective bandits [30, 20]. Third, the  
 62 regret analysis of MO-OCO is intrinsically different from that in the bandits setting.

## 63 B More Details of the Definition of PSG

64 Recall that in Definition 2.3, we formulate the PSG metric as a constrained optimization problem.  
 65 We note that, since the PSG metric is based on the notion of “non-dominance” [30], its most direct  
 66 form is actually

$$\begin{aligned} \Delta'(x; \mathcal{K}^*, H) &= \inf_{\epsilon \geq 0} \epsilon, \\ \text{s.t. } \quad &\forall x'' \in \mathcal{K}^*, \exists i \in \{1, \dots, m\}, h^i(x) - \epsilon < h^i(x'') \\ &\text{or } \forall i \in \{1, \dots, m\}, h^i(x) - \epsilon = h^i(x''). \end{aligned}$$

67 At the first glance, the above definition seems to be quite different from Definition 2.3, since it has  
 68 an extra condition “ $\forall i \in \{1, \dots, m\}, h^i(x) - \epsilon = h^i(x'')$ ”. In the following, we prove that both  
 69 definitions actually yield the same value due to the infimum operation on  $\epsilon$ .

70 Specifically, for any possible  $(x, \mathcal{K}^*, H)$ , we denote  $\Delta'(x; \mathcal{K}^*, H) = \epsilon'_0$  and  $\Delta(x; \mathcal{K}^*, H) = \epsilon_0$ .  
 71 By comparing the constraints of both definitions, it is obvious that  $\epsilon_0$  must satisfy the constraint  
 72 of  $\Delta'(x; \mathcal{K}^*, H)$ , hence the infimum operation guarantees that  $\epsilon'_0 \leq \epsilon_0$ . It remains to prove that  
 73  $\epsilon'_0 \geq \epsilon_0$ . To this end, we only need to show that  $\epsilon'_0 + \xi$  satisfies the constraint of  $\Delta(x; \mathcal{K}^*, H)$  for  
 74 any  $\xi > 0$ . Consider an arbitrary  $x'' \in \mathcal{K}^*$ . From the definition of  $\Delta'(x; \mathcal{K}^*, H)$ , we know that  
 75 either  $\exists i \in \{1, \dots, m\}, h^i(x) - \epsilon'_0 < h^i(x'')$  or  $\forall i \in \{1, \dots, m\}, h^i(x) - \epsilon'_0 = h^i(x'')$ . Whichever  
 76 condition holds, we must have  $\exists i \in \{1, \dots, m\}, h^i(x) - \epsilon'_0 - \xi < h^i(x'')$  for any  $\xi > 0$ . Since it holds  
 77 for any  $x'' \in \mathcal{K}^*$ ,  $\epsilon'_0 + \xi$  lies in the feasible region of  $\Delta(x; \mathcal{K}^*, H)$ , hence we have  $\epsilon_0 \leq \epsilon'_0 + \xi, \forall \xi > 0$   
 78 and thus  $\epsilon_0 \leq \epsilon'_0$ . In summary, we have  $\Delta'(x; \mathcal{K}^*, H) = \Delta(x; \mathcal{K}^*, H)$  for any  $(x, \mathcal{K}^*, H)$ .

## C More Details of The Multi-Objective Static Regret

Recall that we formally formulate the multi-objective static regret  $R_{\text{MOS}}(T)$  by making an extension of the equivalent form of the dynamic variant in Proposition 3.1. In the following, we show that such an alternative form also has a clear physical meaning, i.e., it measures the distance from the cumulative loss  $\sum_{t=1}^T F_t(x_t)$  to the global Pareto front  $\mathcal{P}^* = \mathcal{P}_X(\sum_{t=1}^T F_t)$ , which is in the same spirit of PSG.

**Proposition C.1.** *Denote the Pareto optimal set of the cumulative loss function  $\sum_{t=1}^T F_t$  as  $\mathcal{X}^*$ , and define a metric*

$$\Delta''(\{x_t\}_{t=1}^T; \{F_t\}_{t=1}^T) = \inf_{\epsilon \geq 0} \epsilon, \\ \text{s.t. } \forall x'' \in \mathcal{X}^*, \exists i \in \{1, \dots, m\}, \sum_{t=1}^T F_t^i(x_t) - \epsilon < \sum_{t=1}^T F_t^i(x'').$$

*Then the aforementioned multi-objective static regret  $R_{\text{MOS}}(T)$  equals to  $\Delta''(\{x_t\}_{t=1}^T; \{F_t\}_{t=1}^T)$  if  $R_{\text{MOS}}(T) \geq 0$ .*

The proof is very similar to our derivation of the equivalent form of the dynamic variant, which is omitted here. The above defined metric  $\Delta''(\{x_t\}_{t=1}^T; \{F_t\}_{t=1}^T)$  can be viewed as PSG of the decision sequence  $\{x_t\}_{t=1}^T$  w.r.t. the loss sequence  $\{F_t\}_{t=1}^T$ , as it measures the distance between  $\sum_{t=1}^T F_t(x_t)$  to  $\mathcal{P}^*$ . From the above proposition, we know that when  $R_{\text{MOS}}(T) \geq 0$ , it is exactly equivalent to  $\Delta''(\{x_t\}_{t=1}^T; \{F_t\}_{t=1}^T)$ . Note that in the regret analysis, we are more interested in the case of  $R_{\text{MOS}}(T) \geq 0$ , since when  $R_{\text{MOS}}(T) < 0$ , it is naturally bounded by any sublinear regret bound. Hence, bounding  $R_{\text{MOS}}(T)$  is essentially bounding  $\Delta''(\{x_t\}_{t=1}^T; \{F_t\}_{t=1}^T)$ , which naturally drives the cumulative loss  $\sum_{t=1}^T F_t(x_t)$  to the Pareto front.

**Remark.** At its first glance, our defined regret  $R_{\text{MOS}}(T)$  can be optimized by using the linearization method with fixed weights  $\lambda_0 \in \mathcal{S}_m$ , or alternatively, optimizing a single objective  $i \in \{1, \dots, m\}$ . But we remark that this is not a problem of our regret definition, but **an intrinsic requirement** of Pareto optimality. Specifically, Pareto optimality is the objective of multi-objective optimization, which characterizes the status where no objective can be improved without hurting the others. Hence merely optimizing a single objective naturally achieves Pareto optimality. Please refer to Proposition 8 in [12] for the rigorous proof. As a general performance metric, our regret should indeed incorporate this special case. Moreover, simple linearization may not solve MOO optimally, and more advanced algorithms need to be motivated by extra insights from other aspects, such as the concept of “common descent” in MGDA [10]. Indeed, in both theory (see the remark below Theorem 4.4) and experiment (see empirical results in Figure 1), DR-OMMD achieves a smaller regret than linearization.

## D More Details of The Algorithm

In this section, we provide more details to help better understand the design of DR-OMMD.

First, we remark that our proposed DR-OMMD is actually based on the agile version of online mirror descent [13], where the updated model directly moves to its projecting point onto the decision set at each round. However, we can easily make an analogy and devise a lazy version of DR-OMMD. Specifically, we only need to use a lazy projection operation in the mirror descent step with the composite gradient instead of the agile projection operation (line 8 in Algorithm 1). Note that, the analysis of the lazy version is very similar to that of the agile version [13].

In the following, we give more details of the calculation of min-regularized-norm, and discuss an adaptive version of DR-OMMD with adaptive learning rates  $\eta_t$  and regularization strengths  $\alpha_t$ . Note that there is a typo in the closed-form solution to min-regularized-norm when  $m = 2$  in our main paper (line 277): “ $\eta_t = \max\{\min\{\gamma_t'', 0\}, 1\}$ ” should be “ $\eta_t = \max\{\min\{\gamma_t'', 1\}, 0\}$ ” (see the strict proof of Proposition D.1).

### D.1 More Details of the Calculation of Min-Regularized-Norm

Similar to [27], we first consider the setting of two objectives, namely  $m = 2$ . In this case, for any  $\lambda = (\gamma, 1 - \gamma)$ ,  $\lambda_0 = (\gamma_0, 1 - \gamma_0) \in \mathcal{S}_2$ , the L1-regularization  $\|\lambda - \lambda_0\|_1$  equals to  $2|\gamma - \gamma_0|$ . Hence

124 min-regularized-norm at round  $t$  reduces to  $\lambda_t = (\gamma_t, 1 - \gamma_t)$  where

$$\gamma_t \in \arg \min_{0 \leq \gamma \leq 1} \|\gamma g_1 + (1 - \gamma)g_2\|^2 + 2\alpha|\gamma - \gamma_0|.$$

125 Interestingly, we find that the above problem has a closed-form solution.

126 **Proposition D.1.** Set  $\gamma_L = (g_2^\top (g_2 - g_1) - \alpha) / \|g_2 - g_1\|^2$ , and  $\gamma_R = (g_2^\top (g_2 - g_1) + \alpha) / \|g_2 - g_1\|^2$ .  
 127 Then min-regularized-norm produces weights  $\lambda_t = (\gamma_t, 1 - \gamma_t)$  where

$$\gamma_t = \max\{\min\{\gamma_t'', 1\}, 0\}, \quad \text{where } \gamma_t'' = \max\{\min\{\gamma_0, \gamma_R\}, \gamma_L\}.$$

128 *Proof.* We solve the following two quadratic sub-problems, i.e.,

$$\min_{0 \leq \gamma \leq \gamma_0} h_1(\gamma) = \|\gamma g_1 + (1 - \gamma)g_2\|^2 + 2\alpha(\gamma_0 - \gamma),$$

129 as well as

$$\min_{\gamma_0 \leq \gamma \leq 1} h_2(\gamma) = \|\gamma g_1 + (1 - \gamma)g_2\|^2 + 2\alpha(\gamma - \gamma_0).$$

130 It can be checked that in the former sub-problem,  $h_1$  monotonously decreases on  $(-\infty, \gamma_R]$  and  
 131 increases on  $[\gamma_R, +\infty)$ ; in the latter sub-problem,  $h_2$  monotonously decreases on  $(-\infty, \gamma_L]$  and  
 132 increases on  $[\gamma_L, +\infty)$ . Since each sub-problem has its constraint  $([0, \gamma_0]$  or  $[\gamma_0, 1])$ , the solution to  
 133 the original optimization problem can then be derived by comparing the optimal values of the two  
 134 sub-problems with their constraints. Specifically, notice that  $\gamma_L \leq \gamma_R$  and  $0 \leq \gamma_0 \leq 1$ , and we can  
 135 consider the following three cases.

136 (i) When  $0 \leq \gamma_0 \leq \gamma_L \leq \gamma_R$ , then  $h_1$  monotonously decreases on  $[0, \gamma_0]$  and its minimum on  
 137  $[0, \gamma_0]$  is  $h_1(\gamma_0)$ . Notice that  $h_1(\gamma_0) = h_2(\gamma_0)$ . For the sub-problem of  $h_2$ , we further consider two  
 138 situations:

139 (i-a) If  $\gamma_L \leq 1$ , then  $\gamma_L \in [\gamma_0, 1]$ , hence the minimum of  $h_2$  on  $[\gamma_0, 1]$  is  $h_2(\gamma_L)$ . Since  $h_2(\gamma_L) \leq$   
 140  $h_2(\gamma_0) = h_1(\gamma_0)$ , the minimal point of the original problem is  $\gamma_L$ , and hence  $\gamma_t = \gamma_L$ .

141 (i-b) If  $\gamma_L > 1$ , then  $h_2$  monotonously decreases on  $[\gamma_0, 1]$ , and we surely have  $h_2(1) \leq h_2(\gamma_0) =$   
 142  $h_1(\gamma_0)$ . Hence  $\gamma_t = 1$  in this situation.

143 Combining the above two situations, we have  $\gamma_t = \min\{\gamma_L, 1\}$  in this case.

144 (ii) When  $\gamma_L \leq \gamma_R \leq \gamma_0 \leq 1$ , then  $h_2$  monotonously increases on  $[\gamma_0, 1]$  and its minimum on  $[\gamma_0, 1]$   
 145 is  $h_2(\gamma_0)$ . Notice that  $h_1(\gamma_0) = h_2(\gamma_0)$ . For the sub-problem of  $h_1$ , similar to the first case, we also  
 146 consider two situations:

147 (ii-a) If  $\gamma_R \geq 0$ , then  $\gamma_R \in [0, \gamma_0]$ , hence the minimum of  $h_1$  on  $[0, \gamma_0]$  is  $h_1(\gamma_R)$ . Since  $h_1(\gamma_R) \leq$   
 148  $h_1(\gamma_0) = h_2(\gamma_0)$ , the minimal point of the original problem is  $\gamma_R$ , and hence  $\gamma_t = \gamma_R$ .

149 (ii-b) If  $\gamma_R < 0$ , then  $h_1$  monotonously increases on  $[0, \gamma_0]$ . Hence we have  $h_1(0) \leq h_1(\gamma_0) =$   
 150  $h_2(\gamma_0)$ . Hence the solution to the original problem  $\gamma_t = 0$ .

151 Combining the above two situations, we have  $\gamma_t = \max\{\gamma_R, 0\}$  in this case.

152 (iii) When  $\gamma_L < \gamma_0 < \gamma_R$ , then  $h_1$  monotonously decreases on  $[0, \gamma_0]$  and  $h_2$  monotonously increases  
 153 on  $[\gamma_0, 1]$ . Hence each sub-problem attains its minimum at  $\gamma_0$ , and thus  $\gamma_t = \gamma_0$ .

154 Summarizing the above three cases gives

$$\gamma_t = \begin{cases} \min\{\gamma_L, 1\}, & \gamma_0 \leq \gamma_L; \\ \max\{\gamma_R, 0\}, & \gamma_0 \geq \gamma_R; \\ \gamma_0, & \text{otherwise.} \end{cases}$$

155 We can further rewrite the above formula into a compact form as follows, which can be checked  
 156 case-by-case.

$$\gamma_t = \max\{\min\{\gamma_t'', 1\}, 0\}, \quad \text{where } \gamma_t'' = \max\{\min\{\gamma_0, \gamma_R\}, \gamma_L\},$$

157 This gives the closed-form solution of min-regularized-norm when  $m = 2$ . ■

158 Now that we have derived the closed-form solution to the min-regularized-norm solver with any two  
 159 gradients, in principle, we can apply [27]'s technique to efficiently compute the solution to the solver  
 160 with more than two gradients. We provide the full procedure in Algorithm 1, which is an extension of  
 161 [27]. By following the exact line search technique [14] in MGDA, we get our line search oracle as  
 162 line 5 in Algorithm 1. The first term is the same as that in MGDA, and the second term is an extra

---

**Algorithm 1** Frank-Wolfe Solver for Line 6 in Algorithm 1

---

- 1: **Initialize:**  $\lambda_t = (\gamma_t^1, \dots, \gamma_t^m) = (\frac{1}{m}, \dots, \frac{1}{m})$ .
  - 2: Compute the matrix  $\mathbf{U} = \nabla F_t(x_t)^\top \nabla F_t(x_t)$ , i.e.,  $\mathbf{U}_{ij} = \nabla f_t^i(x_t)^\top \nabla f_t^j(x_t), \forall i, j \in \{1, \dots, m\}$ .
  - 3: **repeat**
  - 4:   Select an index  $k \in \arg \max_{i \in \{1, \dots, m\}} \{\sum_{j=1}^m \gamma_t^j \mathbf{U}_{ij} + \alpha \operatorname{sgn}(\gamma_t^i - \gamma_0^i)\}$ .
  - 5:   Compute  $\delta \in \arg \min_{0 \leq \delta \leq 1} \|\delta \nabla f_t^k(x_t) + (1 - \delta) \nabla F_t(x_t) \lambda_t\|_2^2 + \alpha \|\delta(e_k - \lambda_t) + \lambda_t - \lambda_0\|_1$ .
  - 6:   Update  $\lambda_t = (1 - \delta) \lambda_t + \delta e_k$ .
  - 7: **until**  $\delta \sim 0$  or Number of Iteration Limits
  - 8: **return**  $\lambda_t$ .
- 

163  $l_1$ -regularization term related to the design in Algorithm 1. Unlike the oracle of MGDA that has a  
 164 closed-form solution by a reduction to the case of two gradients, the extra  $l_1$ -norm term makes our  
 165 oracle difficult to get a closed-form solution. The reason is that, such an extra term is the  $l_1$ -norm of  
 166 a  $m$ -dimension vector, hence it can not simply reduce to the case of two gradients. To proceed, we  
 167 can directly apply numerical methods to get the solution (e.g. similar to the implementation in [19]).

## 168 D.2 An Adaptive Version of DR-OMMD

169 We discuss an alternative version of DR-OMMD with adaptive  $\eta_t$  and  $\alpha_t$ , termed A-DR-OMMD. The  
 170 algorithm is presented in Algorithm 2. The analysis of A-DR-OMMD is very similar to the original  
 171 DR-OMMD algorithm. We provide a static regret bound of A-DR-OMMD as below.

172 **Theorem D.2.** *Assume the assumptions of Theorem 4.4 hold. Then for any  $\lambda_0 \in \mathcal{S}_m$  and non-*  
 173 *increasing  $\{\eta_t\}_{t=1}^T$ , A-DR-OMMD attains the following static regret*

$$R_{\text{MOS}}(T) \leq \frac{\gamma D}{\eta_T} + \sum_{t=1}^T \frac{\eta_t}{2} (\|\nabla F_t(x_t) \lambda_t\|_2^2 + \frac{4F}{\eta_t} \|\lambda_t - \lambda_0\|_1).$$

174 **Corollary D.3.** *When  $\eta_t = \frac{\sqrt{2\gamma D}}{G\sqrt{t}}, \alpha_t = \frac{4F}{\eta_t}$ , the above bound is in the order of  $O(\sqrt{T})$ .*

175 Then we give a dynamic regret bound of A-DR-OMMD as follows.

176 **Theorem D.4.** *Assume the assumptions of Theorem 4.6 hold. Then for any  $\lambda_0 \in \mathcal{S}_m$  and non-*  
 177 *increasing  $\{\eta_t\}_{t=1}^T$ , A-DR-OMMD attains the following dynamic regret*

$$R_{\text{MOD}}(T) \leq \frac{\gamma D V_T}{G^2 \eta_T^2} + \sum_{t=1}^T \frac{\eta_t}{2} (\|\nabla F_t(x_t) \lambda_t\|_*^2 + \frac{8G^2 F T}{V_T} (\frac{\eta_T}{\eta_t}) \sum_{t=1}^T \|\lambda_t - \lambda_0\|_1) + 2\eta_T G^2 T.$$

178 **Corollary D.5.** *When  $\eta_t = \frac{1}{G} (\frac{\gamma D V_T}{G t})^{1/3}, \alpha_t = \frac{8G^2 F T}{V_T} (\frac{\eta_T}{\eta_t})$ , the above bound is in the order of*  
 179  *$O(T^{2/3} V_T^{1/3})$ .*

## 180 E More Details of The Theoretical Analysis

181 In this section, we provide more details and highlight technical lemmas in theoretical analysis, which  
 182 are omitted in our main paper due to space limitation. Note that there is a typo in the main paper: in  
 183 the remark below Theorem 4.4 (line 304), " $\eta_t = \frac{\sqrt{2\gamma D}}{G\sqrt{t}}, \alpha_t = \frac{4F}{\eta_t}$ " should be " $\eta = \frac{\sqrt{2\gamma D}}{G\sqrt{T}}, \alpha = \frac{4F}{\eta}$ "  
 184 (see the strict proof of Corollary E.1), which does not affect the following remarks.

### 185 E.1 The Tightness of DR-OMMD's Bounds

186 Recall that in the remarks below Theorem 4.4 and 4.6 in our main paper, we give the order of the  
 187 static regret bound  $O(\sqrt{T})$  and the dynamic regret bound  $O(V_T^{1/3} T^{2/3})$  for DR-OMMD with proper  
 188 choices of  $\eta$  and  $\alpha$ . They are actually directly derived from the main theorems. We present these  
 189 results in formal corollaries as follows.

---

**Algorithm 2** An Adaptive Version of DR-OMMD (A-DR-OMMD)

---

- 1: **Input:** Convex set  $\mathcal{X}$ , time horizon  $T$ , regularization parameters  $\alpha_t$ , learning rates  $\eta_t$ , regularization function  $R$ , user preference  $\lambda_0$ .
  - 2: **Initialize:**  $x_1 \in \mathcal{X}$ .
  - 3: **for**  $t = 1, \dots, T$  **do**
  - 4:   Predict  $x_t$  and receive a loss function  $F_t : \mathcal{X} \rightarrow \mathbb{R}^m$ .
  - 5:   Compute the multiple gradients  $\nabla F_t(x_t) = [\nabla f_t^1(x_t), \dots, \nabla f_t^m(x_t)] \in \mathbb{R}^{n \times m}$ .
  - 6:   Determine the weights for the gradient composition via **min-regularized-norm**

$$\lambda_t = \arg \min_{\lambda \in \mathcal{S}_m} \|\nabla F_t(x_t)\lambda\|_2^2 + \alpha_t \|\lambda - \lambda_0\|_1.$$
  - 7:   Compute the composite gradient  $g_t = \nabla F_t(x_t)\lambda_t$ .
  - 8:   Perform online mirror descent using  $g_t$ 

$$x_{t+1} = \arg \min_{x \in \mathcal{X}} \eta_t \langle g_t, x \rangle + B_R(x, x_t).$$
  - 9: **end for**
- 

190 **Corollary E.1.** With  $\eta = \frac{\sqrt{2\gamma D}}{G\sqrt{T}}$  and  $\alpha = \frac{4F}{\eta}$ , for any  $\lambda_0 \in \mathcal{S}_m$ , DR-OMMD achieves the following  
191 static regret

$$R_{\text{MOS}}(T) \leq O(\sqrt{T}).$$

192 **Corollary E.2.** With  $\eta = \frac{2}{G}(\frac{\gamma DV_T}{GT})^{1/3}$  and  $\alpha = \frac{8FG^2T}{VT}$ , for any  $\lambda_0 \in \mathcal{S}_m$ , DR-OMMD achieves the  
193 following dynamic regret

$$R_{\text{MOD}}(T) \leq O(V_T^{1/3}T^{2/3}).$$

194 Next we show that both of the derived bounds are tight w.r.t.  $m$  regarding any gradient-based  
195 algorithm. Specifically, we follow the standard worst-case analysis of deriving lower bounds and  
196 construct a special case in which any gradient-based algorithm will incur a static or dynamic regret in  
197 the order of  $\Omega(\sqrt{T})$  or  $\Omega(V_T^{1/3}T^{2/3})$ .

198 Consider the case in which  $f_t^1 = f_t^2 = \dots = f_t^m$  at each round  $t$ . In this case, the instantaneous  
199 gradients of all the objectives are identical, i.e.,  $g_t^i = \nabla f_t^i(x_t) \equiv \nabla f_t^1(x_t) = g_t^1, \forall i \in \{1, \dots, m\}$ .  
200 For any gradient-based algorithm, since it can only utilize the gradient information of the objectives,  
201 it cannot distinguish the objective to which a certain gradient belongs. Alternatively speaking, in this  
202 case, any multiple gradient algorithm will **treat all gradients in the same way** and thus behave like  
203 a single-objective algorithm using the single gradient  $g_t^1$ . Hence, in intuition, for any gradient-based  
204 algorithm, the worst-case bounds are **at least independent** of  $m$ . In particular, the worst-case bounds  
205 of gradient-based algorithms cannot decrease as  $m$  increases; otherwise, the above case will be  
206 violated.

207 In the following, we take the static regret as an example and give a detailed proof of the tightness of  
208 the  $O(\sqrt{T})$  bound. In the above case, since  $f_t^1 = f_t^2 = \dots = f_t^m, \forall t$ , the cumulative losses of all the  
209 objectives are also identical, i.e.,  $\sum_{t=1}^T f_t^1 = \sum_{t=1}^T f_t^2 = \dots = \sum_{t=1}^T f_t^m$ . Therefore, the Pareto set  
210  $\mathcal{X}^*$  of the cumulative vector loss  $\sum_{t=1}^T F_t$  coincides with the optimal decision set of the cumulative  
211 loss  $\sum_{t=1}^T f_t^1$  of the first objective, i.e.,  $\mathcal{X}^* = \arg \min_{x \in \mathcal{X}} \sum_{t=1}^T f_t^1(x)$ . From our definition of the  
212 multi-objective static regret, since  $\lambda^\top F_t(x) = f_t^1(x)$  for any  $\lambda \in \mathcal{S}_m$ , we have

$$R_{\text{MOS}}(T) = \sup_{x^* \in \mathcal{X}^*} \left( \sum_{t=1}^T f_t^1(x_t) - \sum_{t=1}^T f_t^1(x^*) \right) = \sum_{t=1}^T f_t^1(x_t) - \min_{x^* \in \mathcal{X}^*} \sum_{t=1}^T f_t^1(x^*),$$

213 which exactly reduces to the static regret  $R_S(T)$  defined by the losses  $\{f_t^1\}_{t=1}^T$  of the first objective.  
214 Hence we have  $R_{\text{MOS}}(T) = R_S(T)$  in this case. Since the losses  $\{f_t^1\}_{t=1}^T$  of the first objective can  
215 be chosen adversarially, we can follow Section 3.2 in [13] to construct a certain sequence  $\{f_t^1\}_{t=1}^T$   
216 that admits a lower bound of  $\Omega(\sqrt{T})$ . Hence in this certain case, any multiple gradient algorithm will  
217 admit  $R_{\text{MOS}}(T) = \Omega(\sqrt{T})$  w.r.t.  $T$  and  $m$ , matching our derived static regret bound for DR-OMMD  
218 in terms of both  $T$  and  $m$ .

219 As for the multi-objective dynamic regret, the analysis is similar. Specifically, since the losses of  
220 all the objectives are identical, the Pareto set  $\mathcal{X}_t^*$  of the instantaneous loss  $F_t$  coincides with the

221 optimal decision set of the scalar loss  $f_t^1$  of the first objective, i.e.,  $\mathcal{X}_t^* = \operatorname{argmin}_{x \in \mathcal{X}} f_t^1(x)$ . Since  
 222  $\lambda^\top F_t(x) = f_t^1(x)$  for any  $\lambda \in \mathcal{S}_m$ , from Proposition 3.1, we have that the multi-objective dynamic  
 223 regret

$$R_{\text{MOD}}(T) = \sup_{x_t^* \in \mathcal{X}_t^*, 1 \leq t \leq T} \sum_{t=1}^T (f_t^1(x_t) - f_t^1(x_t^*)) = \sum_{t=1}^T (f_t^1(x_t) - \min_{x_t^* \in \mathcal{X}} f_t^1(x_t^*)),$$

224 which exactly reduces to the single-objective dynamic regret  $R_D(T)$  defined by the losses  $\{f_t^1\}_{t=1}^T$   
 225 of the first objective. Hence we have  $R_{\text{MOD}}(T) = R_D(T)$  in this case. Recall that in single-objective  
 226 dynamic online learning [3, 33], the best attainable bound is  $R_D(T) = O(V_T^{1/3} T^{2/3})$ . Therefore,  
 227 the best attainable bound w.r.t.  $T$  and  $m$  we may expect in this case is  $R_{\text{MOD}}(T) = O(V_T^{1/3} T^{2/3})$ ,  
 228 and our derived dynamic regret bound for DR-OMMD matches the order in terms of  $T$  and  $m$ .

229 Some readers may suspect it unreasonable that in the multi-objective setting, the derived regret  
 230 bounds do not increase as  $m$  increases. Now we explicate the rationality of such independence in the  
 231 following.

232 For the dynamic version  $R_{\text{MOD}}(T)$ , the independence of  $m$  lies in the adoption of PSG in the  
 233 formulation of the regret. Recall that, in the definition of PSG, “ $\exists i \in \{1, \dots, m\}$ ” means that it  
 234 just needs to pick one coordinate  $i$  to satisfy  $f_t^i(x_t) - \epsilon < f_t^i(x_t^*)$ , which omits the dependency  
 235 of  $m$ . We can see this point from another perspective. Recall that in Proposition 1, PSG at each  
 236 round  $t$  has an equivalent form, namely  $\sup_{x_t^*} \inf_{\lambda_t^* \in \mathcal{S}_m} (\lambda_t^*)^\top (F_t(x_t) - F_t(x_t^*))$ , or equivalently  
 237  $\sup_{x_t^*} \min_{i \in \{1, \dots, m\}} (f_t^i(x_t) - f_t^i(x_t^*))$ . In particular, PSG takes a minimum operation over all  
 238 objectives, and thus it does not necessarily increase as  $m$  increases. For the static version  $R_{\text{MOS}}(T)$ ,  
 239 it similarly takes an infimum over  $\lambda^* \in \mathcal{S}_m$ , or equivalently a minimum operation over all objectives  
 240  $i \in \{1, \dots, m\}$ , and thus it does not necessarily grow with  $m$  either.

241 There is another intuitive way that can help understand the rationality of the independence of  $m$ .  
 242 As is well recognized in existing research in multi-objective optimization [12], the proportion of  
 243 the Pareto optimal solutions (or more precisely, non-dominated solutions) in the decision domain  
 244 tends to increase rapidly as the number of objectives increases. As a consequence, it might not be  
 245 harder to reach the Pareto optimal set when  $m$  turns larger, hence intuitively, the regret bound does  
 246 not necessarily increase as  $m$  increases.

## 247 E.2 More Details in the Comparison with Linearization

248 Recall that in the remark below Theorem 4.4, we show that our derived bound for DR-OMMD is  
 249 smaller than that of linearization. We here remark that the two bounds are basically in the same order.  
 250 Note that this theoretical result is also very commonly seen in the offline setting, where multiple  
 251 gradient algorithms often have the same (convergence) rate as linearization [32, 19]. The benefit  
 252 of multiple gradient algorithms is mainly due to the implementation of gradient composition. For  
 253 example, the concept of common descent [27, 32] eliminates the gradient conflicting issue; the  
 254 resulting algorithm achieves substantial performance improvements compared to linearization in  
 255 their experiments. In this paper, we also consider the concept of common descent in the design of  
 256 DR-OMMD, which has the intrinsic superiority over linearization. We further show that DR-OMMD  
 257 attains smaller bounds than linearization in theory, and significantly outperforms linearization in  
 258 experiments, which are the best we can do for now. More-refined regret bound comparisons are left  
 259 as an open question.

## 260 E.3 A More Detailed Dynamic Regret Bound for DR-OMMD

261 We first introduce an important lemma for our analysis of dynamic regret.

262 **Lemma E.3.** *Suppose the diameter of the decision set  $\mathcal{X}$  is bounded by  $D$ . Assume  $F_t$  is bounded,*  
 263 *i.e.,  $|f_t^i(x)| \leq F$  for any  $x \in \mathcal{X}, t \in \{1, \dots, T\}, i \in \{1, \dots, m\}$ . Then for any  $\lambda_0 \in \mathcal{S}_m, \Delta \in$*

264  $\{1, \dots, T\}$ , DR-OMMD attains the following dynamic regret

$$R_{\text{MOD}}(T) \leq 2\Delta \sum_{t=1}^{T-1} \sup_{x \in \mathcal{X}} |f_t^i(x) - f_{t+1}^i(x)| + \frac{\gamma D}{\eta} \lceil \frac{T}{\Delta} \rceil \\ + \frac{\eta}{2} \sum_{t=1}^T \|\nabla F_t(x_t) \lambda_t\|_*^2 + 4\Delta F T \sum_{t=1}^T \|\lambda_t - \lambda_0\|_1.$$

265 In Corollary E.2, we only give the order of DR-OMMD's regret bound w.r.t. the core factors  $m, T$   
266 and  $V_T$ . In the following theorem, we supplement a more detailed regret bound for DR-OMMD  
267 which explicates the dependency of other factors on the regret. The proof is presented in Appendix I.

268 **Theorem E.4.** Set  $\eta = \frac{2}{G}(\frac{\gamma D V_T}{G T})^{1/3}$  and  $\alpha = \frac{8FG^2 T}{V_T}$ . Then for any  $\lambda_0 \in \mathcal{S}_m, \Delta \in \{1, \dots, T\}$ ,  
269 DR-OMMD attains the following dynamic regret

$$R_{\text{MOD}}(T) \leq (\frac{\gamma D}{G^4})^{1/3} \frac{(V_T)^{1/3}}{T^{1/3}} \sum_{t=1}^T \inf_{\lambda \in \mathcal{S}_m} (\|\nabla F_t(x_t) \lambda\|_*^2 + \frac{8FG^2 T}{V_T} \|\lambda - \lambda_0\|_1) \\ + 2(\gamma D G^2)^{1/3} (V_T)^{1/3} T^{2/3}.$$

270 Note that, as we have discussed in our main paper, just like its simplified version Corollary E.2, the  
271 above theorem is derived under the assumption of "regular" temporal variability, namely  $\Omega(1) \leq$   
272  $V_T \leq o(T)$ , which is implicitly assumed in other works for dynamic online learning [3, 31, 6]. To  
273 give a more general analysis, in the following subsection, we also provide strict regret bounds that  
274 are valid for arbitrary  $V_T \in [0, \infty)$ .

#### 275 E.4 Dynamic Regret Bounds for DR-OMMD Under Arbitrary Temporal Variability

276 We here provide a detailed dynamic regret bound for DR-OMMD under arbitrary temporal variability  
277  $V_T \in [0, \infty)$ . Specifically, we first give a detailed regret bound in analogy to Theorem E.4. The proof  
278 of this theorem is given in Appendix I.

279 **Theorem E.5.** In DR-OMMD, set  $\eta = \min\{\max\{\frac{2}{G}(\frac{\gamma D V_T}{G T})^{1/3}, \frac{4V_T}{G^2 T}\}, \frac{4V_T}{G^2}\}$  and  $\alpha = \frac{8FG^2 T}{V_T}$ .  
280 Then it attains the following dynamic regret

$$R_{\text{MOD}}(T) \leq \max\{(\frac{\gamma D}{G^4})^{1/3} \frac{(V_T)^{1/3}}{T^{1/3}} \sum_{t=1}^T \inf_{\lambda \in \mathcal{S}_m} \left( \frac{8FG^2 T}{V_T} \|\lambda - \lambda_0\|_1 + \|\nabla F_t(x_t) \lambda\|_*^2 \right) \\ + 2(\gamma D G^2)^{1/3} (V_T)^{1/3} T^{2/3}, \quad 6V_T, \quad \frac{3G}{2} (2\gamma D)^{1/2} T^{1/2}\}.$$

281 The above bound can be rewritten into a simpler form, if we are only interested in its order w.r.t.  
282  $m, T$  and  $V_T$ , just as in Corollary E.2.

283 **Corollary E.6.** In DR-OMMD, set  $\eta = \min\{\max\{\frac{2}{G}(\frac{\gamma D V_T}{G T})^{1/3}, \frac{4V_T}{G^2 T}\}, \frac{4V_T}{G^2}\}$  and  $\alpha = \frac{8FG^2 T}{V_T}$ .  
284 Then it attains the following dynamic regret

$$R_{\text{MOD}}(T) \leq \max\{O(V_T^{1/3} T^{2/3}), O(V_T), O(T^{1/2})\}.$$

## 285 F More Experimental Results

### 286 F.1 More Details of the Experimental Setup

287 The *protein* and *covtype* datasets used in our experiments are publicly available in [11]. The  
288 *MultiMNIST* dataset is acquired by the code provided by [27].

289 All runs are deployed on Xeon(R) E5-2699 @ 2.2GHz.

### 290 F.2 More Results for Adaptive Regularization

291 We supplement the empirical results on *covtype* in Figure 1, which have been omitted from our main  
292 paper due to the lack of space. These results are consistent with the results on *protein* as presented in  
293 our main paper.



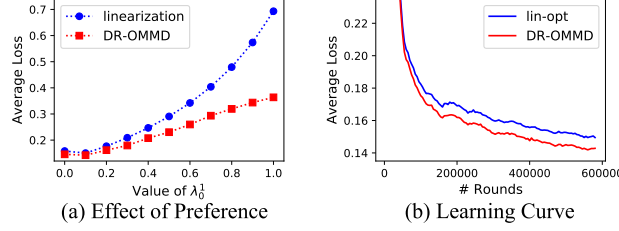

Figure 1: Results to verify the effectiveness of adaptive regularization on *covtype*. (a) Performance of DR-OMMD and linearization under varying  $\lambda_0 = (\lambda_0^1, 1 - \lambda_0^1)$ . (b) Performance using the optimal weights  $\lambda_0 = (0.1, 0.9)$ .

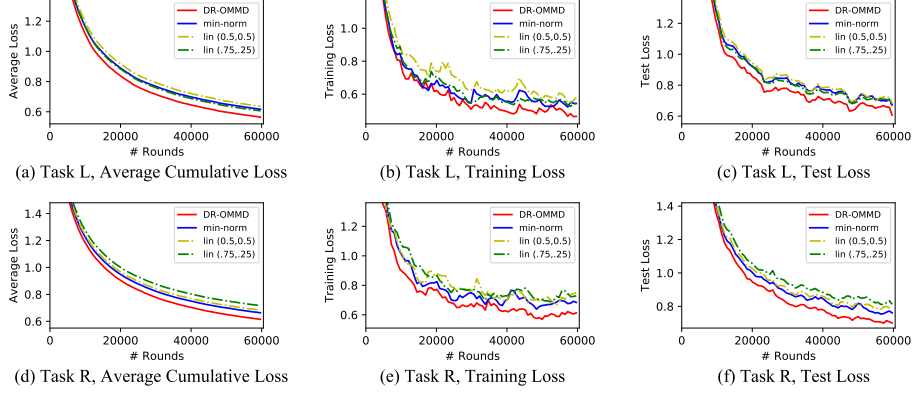

Figure 2: Results to verify the effectiveness of DR-OMMD for online deep learning. The plots show the average cumulative loss, training loss and test loss for both tasks (*task L* and *task R*) on MultiMNIST.

### 294 F.3 Non-Convex Experiments: Deep Multi-Task Learning via Multi-Objective Optimization

295 We evaluate DR-OMMD in the online non-convex setting. We adopt MultiMNIST [26], which is  
 296 a multi-task version of the MNIST dataset for image classification and commonly used in deep  
 297 multi-task learning [27, 18]. In MultiMNIST, each sample is constructed by putting a random image  
 298 of some digit at the top-left and another image at the bottom-right. The goal to classify the digit at  
 299 the top-left (*task L*) and that at the bottom-right (*task R*) at the same time.

300 We follow [27]’s setup and adopt the LeNet architecture. For linearization, we examine two choices  
 301 of weights (0.5, 0.5) and (0.75, 0.25) [18]. For all the examined algorithms, learning rates  $\eta$  are  
 302 selected via a grid search over  $\{0.0001, 0.001, 0.01, 0.1\}$ . For DR-OMMD, the parameter  $\alpha$  is set  
 303 according to Theorem 4.4, and the initial weights are simply set as  $\lambda_0 = (0.5, 0.5)$ . Note that in  
 304 online experiments, samples arrive at the learner one after another in a sequential manner, which is  
 305 largely different from offline experiments where batches of samples are randomly sampled from the  
 306 training set.

307 Figure 2 compares the average cumulative loss, training loss and test loss of all the examined  
 308 algorithms. Note that the first metric is often used in online experiments and the last two are  
 309 commonly used in offline experiments [25]. The results show that DR-OMMD outperform counterpart  
 310 algorithms using min-norm or linearization in all metrics on both tasks, which verifies the effectiveness  
 311 of DR-OMMD in the online non-convex setting.

312

### 313 F.4 More Results for Simulation Experiment: Handling Unknown $V_T$

314 Recall that our analysis of the multi-objective dynamic regret  $R_{\text{MOD}}(T)$  follows the dynamic setting  
 315 of [3], where the temporal variability  $V_T$  is assumed to be known in advance. However, in many  
 316 real-world application scenarios, the value of  $V_T$  is often unknown to the learner. Since the step size

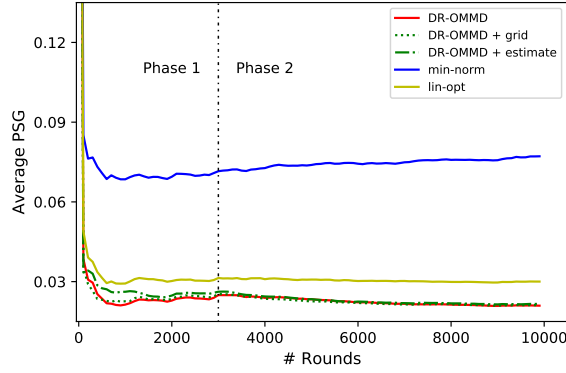

Figure 3: The plot compares the performance of DR-OMMD using grid search, DR-OMMD using estimated  $V_T$ , DR-OMMD using true  $V_T$ , and the two baselines.

$\eta$  and the regularization strength  $\alpha$  in DR-OMMD depend on  $V_T$ , we need to handle unknown  $V_T$  when applying DR-OMMD to these scenarios.

In fact, in online learning, it is ubiquitous that the choice of hyperparameters depends on the value of some parameters that are hard to know in advance [24, 3]. Typically, there are many approaches to handle unknown parameters. Here we discuss three of them in the existing literature.

The first way is to conduct a grid search on the unknown parameter and choose the best setting from the grid [22]. Since the only unknown parameter in our dynamic setting is  $V_T$ , similar to the grid search conducted in [22], we can directly perform a grid search on  $V_T$  and then derive  $\eta$  and  $\alpha$  from  $V_T$ . Specifically, we set the grid of  $V_T$  as  $\{2^i \mid 1 \leq i \leq N_1\}$ . Then the hyperparameters can be set as  $\eta = \frac{2}{G}(\frac{\gamma D v}{G T})^{1/3}$  and  $\alpha = \frac{8 F G^2 T}{v}$  for  $v \in \{2^i \mid 1 \leq i \leq N_1\}$ . In the simulation experiment, since the time horizon  $T = 10000$  and the maxima of the loss function  $F \leq 9$ , we set  $N_1 = 17$  so that any possible  $V_T$  lies in the range of our grid  $[2, 2^{N_1}]$ . We conduct DR-OMMD using the above grid, and find that the best value of  $v$  is 13.

The second way is to fit the unknown parameter into some growth pattern w.r.t.  $T$ . For example, [3] assume  $V_T = T^\beta$  and estimate the value of  $\beta$ . Following [3], we can estimate  $\beta$  according to the first  $T'$  rounds. In the simulation experiment, we set  $T' = 1000$ , which is considerably small compared to the total time horizon  $T = 10000$ . We first simulate for  $T'$  rounds and derive the estimate  $\hat{\beta} = 0.95$ , then use  $V_T = T^{0.95}$  to decide the hyperparameters  $\eta$  and  $\alpha$ .

The third way is to combine the above grid search with a meta-algorithm [34]. For example, [34] runs multiple dynamic algorithms with varying hyperparameters and uses a meta-algorithm called VariationHedge to integrate the decision of each algorithm. Following [34], in practice, we can run multiple DR-OMMDs where  $\eta$  and  $\alpha$  are decided by the above grid  $V_T \in \{2^i \mid 1 \leq i \leq N_1\}$ .

We realize the first two approaches in the simulation experiment, and compare their performance with DR-OMMD using the true  $V_T$  and *min-norm* and *lin-opt* in Figure 3. The results show that DR-OMMD equipped with the above approaches perform comparably to DR-OMMD using the true  $V_T$  and substantially outperforms the two examined baselines. Specifically, the average regret of DR-OMMD using grid search is 0.0211, and the average regret of DR-OMMD using estimated  $V_T$  is 0.0216. They are slightly worse than DR-OMMD using the true  $V_T$  (0.0209) but still substantially better than the *min-norm* (0.0772) and *lin-opt* (0.0302) baselines.

## G Omitted Proofs of Proposition 3.1 (The Equivalent Form of Multi-Objective Dynamic Regret)

*Proof.* We first analyze the PSG measurement  $\Delta_t(x_t)$  at each round  $t \in \{1, \dots, T\}$ . Specifically, for any comparator  $x \in \mathcal{X}$ , we first define the **pair-wise suboptimality gap** between decisions  $x_t$  and  $x$ , i.e.,

$$\delta_t(x_t; x) = \inf_{\epsilon \geq 0} \{\epsilon \mid F_t(x_t) - \epsilon \mathbf{1} \not\leq F_t(x)\}.$$

351 Then PSG can be expressed via  $\Delta_t(x_t) = \sup_{x \in \mathcal{P}_X(F_t)} \delta_t(x_t, x)$ .

352 We then focus on the pair-wise gap  $\delta_t(x_t; x)$  w.r.t. any Pareto optimal decision  $x \in \mathcal{X}_t^* \equiv \mathcal{P}_X(F_t)$ .  
 353 Since  $x$  is a Pareto optimal decision of  $F_t$ , from the definition of Pareto optimality, there must exist  
 354 some  $i \in \{1, \dots, m\}$  such that  $f_t^i(x_t) - f_t^i(x) \geq 0$ .

355 The pair-wise suboptimality gap has an equivalent expression, namely,

$$\delta_t(x_t; x) = \min_{k \in \{1, \dots, m\}} \{(f_t^k(x_t) - f_t^k(x))_+\},$$

356 where  $(l)_+ = \max\{l, 0\}$ ,  $l \in \mathbb{R}$  is the truncation operator. Denote  $\mathcal{U}_m = \{e_k \mid 1 \leq k \leq m\}$  as the  
 357 set of all unit vector in  $\mathbb{R}^m$ , then we equivalently have

$$\delta_t(x_t; x) = \min_{\lambda \in \mathcal{U}_m} \lambda^\top (F_t(x_t) - F_t(x))_+.$$

358 Note that, we here slightly abuse the truncation operator  $(l)_+$  to allow  $l$  to be a vector in  $\mathbb{R}^m$ , which  
 359 represents the vector whose  $i$ -th coordinate equals to  $\max\{l^i, 0\}$  for any  $i \in \{1, \dots, m\}$ .

360 Now the calculation of  $\delta_t(x_t; x)$  becomes a minimization problem over  $\lambda \in \mathcal{U}_m$ . Since  $\mathcal{U}_m$  is a  
 361 discrete set, we can apply a linear relaxation trick. Specifically, we now turn to minimize the quantity  
 362  $p(\lambda) = \lambda^\top (F_t(x_t) - F_t(x))_+$  over the convex curvature of  $\mathcal{U}_m$ , which is exactly the probability  
 363 simplex  $\mathcal{S}_m = \{\lambda \in \mathbb{R}^m \mid \lambda \succ \mathbf{0}, \|\lambda\|_1 = 1\}$ . Note that,  $\mathcal{U}_m$  contains all vertexes of  $\mathcal{S}_m$ . Since  
 364  $\inf_{\lambda \in \mathcal{S}_m} p(\lambda)$  is a linear optimization problem, the minimal point  $\lambda_t^*$  must be a vertex of the simplex,  
 365 i.e.,  $\lambda_t^* \in \mathcal{U}_m$ . Thus the relaxed problem is equivalent to the original problem, namely,

$$\min_{\lambda \in \mathcal{U}_m} \lambda^\top (F_t(x_t) - F_t(x))_+ = \inf_{\lambda \in \mathcal{S}_m} \lambda^\top (F_t(x_t) - F_t(x))_+.$$

366 For now, we have transformed the calculation of pair-wise suboptimality gap  $\delta_t(x_t; x)$  into a opti-  
 367 mization problem of finding the minimal linear scalarization of  $(F_t(x_t) - F_t(x))_+$ . Hence, the PSG  
 368 at each round  $t$  can be expressed as

$$\Delta_t(x_t) = \sup_{x \in \mathcal{X}_t^*} \inf_{\lambda \in \mathcal{S}_m} \lambda^\top (F_t(x_t) - F_t(x))_+.$$

369 In the above expression, the existence of truncation operator  $(\cdot)_+$  will incur irregularity (i.e., non-  
 370 linearity) when we try to optimize the loss  $F_t$ . Surprisingly, we find that such operator **can be dropped**  
 371 when we compute  $\Delta_t(x_t)$  w.r.t. the Pareto set  $\mathcal{X}_t^*$ , as shown in the following.

372 **Lemma G.1.** *Let  $\mathcal{X}_t^*$  be the Pareto set of  $F_t : \mathcal{X} \rightarrow \mathbb{R}^m$ . Then for any  $x_t \in \mathcal{X}$ , it holds that*

$$\sup_{x \in \mathcal{X}^*} \inf_{\lambda \in \mathcal{S}_m} \lambda^\top (F_t(x_t) - F_t(x))_+ = \sup_{x \in \mathcal{X}_t^*} \inf_{\lambda \in \mathcal{S}_m} \lambda^\top (F_t(x_t) - F_t(x)).$$

373 *Proof.* Define the alternative “gap” metric without the truncation operator as  $\delta'_t(x_t; x) =$   
 374  $\inf_{\lambda \in \mathcal{S}_m} \lambda^\top (F_t(x_t) - F_t(x))$ . Moreover, define the supremum of  $\delta'_t(x_t; x)$  over  $x \in \mathcal{X}_t^*$  as  
 375  $\Delta'_t(x_t) = \sup_{x \in \mathcal{X}_t^*} \delta'_t(x_t; x)$ . Then from the definition of truncation operator  $(\cdot)_+$ , we have  
 376  $\delta(x_t; x) \geq \delta'(x_t; x)$  and  $\Delta_t(x_t) \geq \Delta'_t(x_t)$ .

377 It then suffices to prove that, for any given  $x_t \in \mathcal{X}$ , there exists some certain  $x_t^* \in \mathcal{X}_t^*$  such that the  
 378 value of  $\delta'(x_t; x_t^*)$  can be as large as  $\Delta_t(x_t)$ . Indeed, if this is the case, then  $\Delta_t(x_t) \leq \Delta'_t(x_t)$ , and  
 379 hence the two quantities  $\Delta_t(x_t)$  and  $\Delta'_t(x_t)$  are equal. We consider the following two cases:

380 (i)  $x_t$  is already a Pareto optimal point of  $F_t$ , i.e.,  $x_t \in \mathcal{X}_t^*$ . Then from the definition of PSG, we  
 381 directly have  $\Delta_t(x_t) = 0$ . Notice that  $\delta'(x_t; x_t) = 0$ , and hence  $\Delta_t(x_t) = \sup_{x \in \mathcal{X}_t^*} \delta'(x_t; x) \geq$   
 382  $\delta'(x_t; x_t) = 0$ . Consequently, the relation  $\Delta_t(x_t) \leq \Delta'_t(x_t)$  holds in this case.

383 (ii)  $x_t$  is not a Pareto optimal point of  $F_t$ , i.e.,  $x_t \notin \mathcal{X}_t^*$ . Then we have  $\Delta_t(x_t) > 0$ . Set  $\epsilon = \Delta_t(x_t)$ ,  
 384 and denote  $x_t^* \in \arg \max_{x \in \mathcal{X}_t^*} \delta_t(x_t; x)$ , then  $\delta_t(x_t; x_t^*) = \epsilon > 0$ . Therefore, from the definition of  
 385  $\delta_t(x_t; x_t^*)$  we know that, for any  $i \in \{1, \dots, m\}$ , we have  $f_t^i(x_t) - f_t^i(x_t^*) \geq \epsilon$ . Thus all entries of  
 386  $F_t(x_t) - F_t(x_t^*)$  are positive, and we have  $(F_t(x_t) - F_t(x_t^*))_+ = F_t(x_t) - F_t(x_t^*)$ . Consequently,  
 387 we have  $\Delta'_t(x_t) = \sup_{x \in \mathcal{X}_t^*} \delta'_t(x_t; x) \geq \delta'(x_t; x_t^*) = \delta(x_t; x_t^*) = \Delta_t(x_t)$ . ■

From the above lemma, the PSG measurement at round  $t$  has an equivalent form as

$$\Delta_t(x_t) = \sup_{x \in \mathcal{X}_t^*} \inf_{\lambda \in \mathcal{S}_m} \lambda^\top (F_t(x_t) - F_t(x)),$$

and correspondingly, the multi-objective dynamic regret becomes

$$R_{\text{MOD}}(T) = \sum_{t=1}^T \Delta_t(x_t) = \sum_{t=1}^T \sup_{x \in \mathcal{X}_t^*} \inf_{\lambda \in \mathcal{S}_m} \lambda^\top (F_t(x_t) - F_t(x)).$$

Since the time horizon  $T$  is finite, we can first swap the summation over  $t$  and the supremum over  $x$ , then swap the summation over  $t$  and the infimum over  $\lambda$ . Then the multi-objective dynamic regret further equals to

$$R_{\text{MOD}}(T) = \sup_{x_t^* \in \mathcal{X}_t^*, 1 \leq t \leq T} \inf_{\lambda_1^*, \dots, \lambda_T^* \in \mathcal{S}_m} \sum_{t=1}^T (\lambda_t^{*\top} F_t(x_t) - \lambda_t^{*\top} F_t(x_t^*)),$$

which proves the proposition. ■

## H Omitted Proofs of Proposition 4.1 (Min-Norm May Incur Linear Regrets)

*Proof.* As we have described in our main paper, we consider the following two-objective optimization problem. Decision domain is set as  $\mathcal{X} = \{(u, v) \mid u + v \leq \frac{1}{2}, v - u \leq \frac{1}{2}, v \geq 0\}$ . At each round  $t$ , the loss function  $F_t : \mathcal{X} \rightarrow \mathbb{R}^2$  takes

$$F_t(x) = \begin{cases} (\|x - a\|^2, \|x - b\|^2), & t = 2k - 1, k = 1, 2, \dots; \\ (\|x - b\|^2, \|x - c\|^2), & t = 2k, k = 1, 2, \dots, \end{cases}$$

where  $a = (-2, -1), b = (0, 1), c = (2, -1)$ . For simplicity of analysis, we first consider the case when the total time horizon  $T$  is an even number. Then it can be checked that the cumulative loss function takes

$$\begin{aligned} \sum_{t=1}^T F_t(x) &= \frac{T}{2} \cdot (\|x - a\|^2 + \|x - b\|^2, \|x - b\|^2 + \|x - c\|^2) \\ &= T \cdot ((u + 1)^2 + v^2 + 2, (u - 1)^2 + v^2 + 2), \end{aligned}$$

for any  $x = (u, v) \in \mathcal{X}$ . Obviously the Pareto optimal set  $\mathcal{X}^*$  of the cumulative loss coincides with the line segment between  $(-1, 0)$  and  $(1, 0)$ , i.e.,  $\mathcal{X}^* = \{(u, v) \mid -\frac{1}{2} \leq u \leq \frac{1}{2}, v = 0\}$  (note that  $\mathcal{X}^*$  is the intersection of the line segment and  $\mathcal{X}$ ).

Now consider equipping OMD with vanilla min-norm, where the composite gradients are produced by the min-norm method. Suppose the learning process starts at any  $x_1 = (u_1, v_1) \in \mathcal{X}$  such that  $v_1 > 0$ . Note that this is true if and only if  $x_1 \notin \mathcal{X}^*$ . Then for the iterate  $x_t = (u_t, v_t)$  at each round  $t$ , we can directly calculate the gradients as

$$\begin{aligned} g_t^1 &= \begin{cases} 2(x_t - a) = (2u_t + 4, 2v_t + 2), & t = 2k - 1; \\ 2(x_t - b) = (2u_t, 2v_t - 2), & t = 2k. \end{cases} \\ g_t^2 &= \begin{cases} 2(x_t - b) = (2u_t, 2v_t - 2), & t = 2k - 1; \\ 2(x_t - c) = (2u_t - 4, 2v_t + 2), & t = 2k. \end{cases} \end{aligned}$$

The min-norm weights can be computed as  $\lambda_t = (\gamma_t, 1 - \gamma_t)$  where

$$\gamma_t = \begin{cases} \frac{(x_t - b)^\top (a - b)}{\|a - b\|^2} = \frac{1 - u_t - v_t}{4}, & t = 2k - 1; \\ \frac{(x_t - c)^\top (b - c)}{\|b - c\|^2} = \frac{3 - u_t + v_t}{4}, & t = 2k. \end{cases}$$

The composite gradient

$$g_t^{\text{comp}} = \begin{cases} \gamma_t \cdot 2(x - a) + (1 - \gamma_t) \cdot 2(x - b) = (u_t - v_t + 1, -u_t + v_t - 1), & t = 2k - 1; \\ \gamma_t \cdot 2(x - b) + (1 - \gamma_t) \cdot 2(x - c) = (-u_t - v_t - 1, -u_t - v_t - 1), & t = 2k. \end{cases}$$

410 Recall that the update form of OMD takes

$$x_{t+1} = \Pi_{\mathcal{X}}(x_t - \eta_t g_t^{comp}),$$

411 where  $\eta_t > 0$  is the learning rate and  $\Pi_{\mathcal{X}}$  is the projection operation onto  $\mathcal{X}$ . Denote the iterate  
 412  $x_t = (u_t, v_t)$  at each round. Now we can investigate the relation between  $x_t$  and  $x_{t+1}$  by considering  
 413 the following two cases:

- 414 (i) If  $x_t - \eta_t g_t^{comp} \in \mathcal{X}$ , then we do not need projection, and directly have  $x_{t+1} = x_t - \eta_t g_t^{comp}$ .  
 415 (ii) If  $x_t - \eta_t g_t^{comp} \notin \mathcal{X}$ , then we need to project  $x_t - \eta_t g_t^{comp}$  back to  $\mathcal{X}$ . Denote  $x'_{t+1} =$   
 416  $x_t - \eta_t g_t^{comp}$ . For simplicity we consider the projection based on the Euclidean distance, namely  
 417  $\Pi_{\mathcal{X}}(x) = \arg \min_{x' \in \mathcal{X}} \|x - x'\|_2^2$ . Since the composite gradient is orthogonal to the boundary on  
 418 which the iterate after projection  $x_{t+1} = \Pi_{\mathcal{X}}(x'_{t+1})$  is located, it can be checked that  $x_{t+1}$  lies on  
 419 the line segment linking  $x_t$  and  $x'_{t+1}$ . Alternatively speaking,  $x_{t+1}$  can be expressed as  $x_t - \eta'_t g_t^{comp}$   
 420 for some  $0 \leq \eta'_t < \eta_t$ .

421 Combining the above two cases, we know that at each round  $t$ , there exists some  $\eta'_t \in [0, \eta_t]$   
 422 such that  $x_{t+1} = x_t - \eta'_t g_t^{comp}$ . Now we can analyze the relation between each entry of  $x_t$  and  
 423  $x_{t+1}$ . Specifically, since the second entry of the composite gradient is always non-positive, namely  
 424  $-u_t + v_t - 1 \leq 0$  and  $-u_t - v_t - 1 \leq 0$ , we have  $v_{t+1} \geq v_t$  for any  $t$ . Moreover, since the first entry  
 425 of  $g_t^{comp}$  is non-negative when  $t = 2k - 1$ , namely  $u_{2k-1} - v_{2k-1} + 1 \geq 0$ , we have  $u_{2k} \leq u_{2k-1}$   
 426 for any  $k$ ; since the first entry of  $g_t^{comp}$  is non-positive when  $t = 2k$ , namely  $-u_{2k} - v_{2k} - 1 \leq 0$ ,  
 427 we have  $u_{2k+1} \geq u_{2k}$  for any  $k$ .

428 Now we can go back to analyze the gap between the composite weights at any two consecutive  
 429 rounds. It is easy to verify that  $\gamma_{2k-1} < \gamma_{2k}$  and  $\gamma_{2k} > \gamma_{2k+1}$ , hence we have

$$\begin{aligned} \|\lambda_{2k} - \lambda_{2k-1}\|_1 &= 2(\gamma_{2k} - \gamma_{2k-1}) = \frac{2 - (u_{2k} - u_{2k-1}) + (v_{2k} + v_{2k-1})}{2} \geq 1 + v_1, \\ \|\lambda_{2k+1} - \lambda_{2k}\|_1 &= 2(\gamma_{2k} - \gamma_{2k+1}) = \frac{2 - (u_{2k} - u_{2k+1}) + (v_{2k} + v_{2k+1})}{2} \geq 1 + v_1. \end{aligned}$$

430 Therefore, the composite weights  $\lambda_t$  indeed change radically at any two consecutive rounds.

431 The above analysis on  $v_t$  also implies the failure of min-norm in this problem. Recall that any Pareto  
 432 optimal solution  $x^* = (u^*, v^*) \in \mathcal{X}^*$  must satisfy  $v^* = 0$ . Suppose the initial iterate  $x_1 = (u_1, v_1)$   
 433 does not lie in  $\mathcal{X}^*$ , i.e.,  $v_1 > 0$ , which is almost sure for random initialization  $x_1 \in \mathcal{X}$ . Then we  
 434 iteratively have  $0 < v_1 \leq v_2 \leq \dots \leq v_T$ , which means that  $x_t$  moves away from the Pareto set  $\mathcal{X}^*$ .

435 In the following, we strictly prove that min-norm indeed incurs a **linear** multi-objective static regret.  
 436 To calculate  $R_{\text{MOS}}(T)$ , we first investigate the quantity  $R(x^*, \lambda) = \lambda^\top \sum_{t=1}^T (F_t(x_t) - F_t(x^*))$  for  
 437 any fixed weights  $\lambda = (\gamma, 1 - \gamma) \in \mathcal{S}_2$  and best fixed decision  $x^* = (u^*, 0) \in \mathcal{X}^*$ . Specifically,  
 438 recall the form of  $\sum_{t=1}^T F_t$  derived above, then we have

$$\lambda^\top \sum_{t=1}^T F_t(x^*) = (\gamma(u^* + 1)^2 + (1 - \gamma)(u^* - 1)^2 + 2)T.$$

439 Denote the cumulative loss  $\sum_{t=1}^T F_t(x_t) = (L_1, L_2)$ , we now consider the loss of each objective  $L_1$   
 440 and  $L_2$  separately. Specifically, for the first objective, we have

$$L_1 = \sum_{k=1}^{T/2} ((u_{2k-1} + 2)^2 + u_{2k}^2 + (v_{2k-1} + 1)^2 + (v_{2k} - 1)^2).$$

441 Since  $0 < v_1 \leq v_2 \leq \dots \leq v_T \leq 1$ , for the term regarding  $v_t$  we have

$$\begin{aligned} \sum_{k=1}^{T/2} ((v_{2k-1} + 1)^2 + (v_{2k} - 1)^2) &= (v_1 + 1)^2 + (v_T - 1)^2 + \sum_{k=1}^{T/2-1} ((v_{2k} - 1)^2 + (v_{2k+1} + 1)^2) \\ &\geq \sum_{k=1}^{T/2-1} ((v_{2k} - 1)^2 + (v_{2k} + 1)^2) = \sum_{k=1}^{T/2-1} (2v_{2k}^2 + 2) \\ &\geq \sum_{k=1}^{T/2-1} (2v_1^2 + 2) = (2v_1^2 + 2)(\frac{T}{2} - 1) \geq v_1^2 T + T - 2. \end{aligned}$$

442 For the  $k$ -th term regarding  $u_t$ , we have

$$(u_{2k-1} + 2)^2 + u_{2k}^2 = (u_{2k-1} + 1)^2 + (u_{2k} + 1)^2 + 2(u_{2k-1} - u_{2k}) + 2.$$

443 Recall that we have derived  $u_{2k} \leq u_{2k-1}$ , thus we have

$$\sum_{k=1}^{T/2} (u_{2k-1} + 2)^2 + u_{2k}^2 \geq \sum_{k=1}^{T/2} ((u_{2k-1} + 1)^2 + (u_{2k} + 1)^2 + 2) \geq \sum_{t=1}^T (u_t + 1)^2 + T \geq (\bar{u} + 1)^2 T + T,$$

444 where  $\bar{u} = \frac{1}{T} \sum_{t=1}^T u_t$  and the last inequality is derived from Jensen's inequality. In summary, for  
445 the cumulative loss  $L_1$  of the first objective, we have

$$L_1 \geq (\bar{u} + 1)^2 T + v_1^2 T + 2T - 2.$$

446 Similarly, we can analyze the cumulative loss  $L_2$  of the second objective

$$L_2 = \sum_{k=1}^{T/2} (u_{2k-1}^2 + (u_{2k} - 2)^2 + (v_{2k-1} - 1)^2 + (v_{2k} + 1)^2).$$

447 Since  $0 < v_1 \leq v_2 \leq \dots \leq v_T \leq 1$ , for the term regarding  $v_t$  we have

$$\sum_{k=1}^{T/2} ((v_{2k-1} - 1)^2 + (v_{2k} + 1)^2) \geq \sum_{k=1}^{T/2} ((v_{2k-1} - 1)^2 + (v_{2k-1} + 1)^2) \geq v_1^2 T + T.$$

448 For the term regarding  $u_t$ , we also have

$$\begin{aligned} \sum_{k=1}^{T/2} (u_{2k-1}^2 + (u_{2k} - 2)^2) &= \sum_{k=1}^{T/2} ((u_{2k-1} - 1)^2 + (u_{2k} - 1)^2 + 2(u_{2k-1} - u_{2k}) + 2) \\ &\geq \sum_{t=1}^T (u_t - 1)^2 + T \geq (\bar{u} - 1)^2 T + T, \end{aligned}$$

449 where the last inequality is derived from Jensen's inequality. Therefore, we have

$$L_2 \geq (\bar{u} - 1)^2 T + v_1^2 T + 2T.$$

450 Combining the above inequalities, we have

$$\begin{aligned} R(x^*, \lambda) &= \gamma L_1 + (1 - \gamma) L_2 - \lambda^\top \sum_{t=1}^T F_t(x^*) \\ &\geq \gamma((\bar{u} + 1)^2 - (u^* + 1)^2) + (1 - \gamma)((\bar{u} - 1)^2 - (u^* - 1)^2) + v_1^2 T - 2\gamma. \end{aligned}$$

451 For any  $\lambda \in \mathcal{S}_2$  (i.e.,  $\gamma \in [0, 1]$ ), set  $x' = (\bar{u}, 0) \in \mathcal{X}^*$ , then it holds that

$$R(x', \lambda) \geq v_1^2 T - 2.$$

452 Equivalently, the multi-objective static regret satisfies

$$R_{\text{MOS}}(T) = \sup_{x^* \in \mathcal{X}^*} \inf_{\lambda \in \mathcal{S}_2} R(x^*, \lambda) \geq \inf_{\lambda \in \mathcal{S}_2} R(x', \lambda) \geq v_1^2 T - 2,$$

453 which is linear w.r.t.  $T$  for any  $x_1 = (u_1, v_1) \in \mathcal{X}$  such that  $v_1 > 0$ .

454 We now investigate the case when  $T$  is an odd number. Since the calculation of the composite weights  
455  $\lambda_t$  and the composite gradient  $g_t^{\text{comp}}$  at each round is independent of the total time horizon  $T$ , we  
456 still have  $\|\lambda_{t+1} - \lambda_t\|_1 \geq v_1 + 1$  for any  $t$ . Hence the first desired property also holds for any odd  $T$ .

457 It remains to prove that OMD with min-norm still incurs a linear regret when  $T$  is odd. In this case,  
458 the Pareto optimal set  $\mathcal{X}^*$  does not lie in the  $x$ -axis anymore, hence it is difficult to directly compute  
459  $R_{\text{MOS}}(T)$ . However, we can still use our derived  $R(x^*, \lambda)$  for any even  $T$  to estimate the regret.  
460 Specifically, set  $x' = (\frac{1}{T-1} \sum_{t=1}^{T-1} u_t, 0)$ ; from the above derivation with even  $T$ , for any  $\lambda \in \mathcal{S}_2$ , we  
461 still have (note that now  $T - 1$  is an even number)

$$\lambda^\top \sum_{t=1}^{T-1} F_t(x_t) - \lambda^\top \sum_{t=1}^{T-1} F_t(x') \geq v_1^2 T - 2.$$

462 Since for any  $x \in \mathcal{X}$ , we have  $0 \leq \|x - a\|^2, \|x - b\|^2, \|x - c\|^2 \leq 10$ , we have

$$R(x', \lambda) = \lambda^\top \sum_{t=1}^T F_t(x_t) - \lambda^\top \sum_{t=1}^T F_t(x') \geq v_1^2 T - 12.$$

463 Furthermore, from the definition of Pareto optimality, there exists some  $x'' \in \mathcal{X}^*$  that Pareto  
464 dominates  $x'$  regarding the cumulative loss  $\sum_{t=1}^T F_t$ , namely  $\sum_{t=1}^T F_t(x'') \preceq \sum_{t=1}^T F_t(x')$ . Hence

$$R(x'', \lambda) = \lambda^\top \sum_{t=1}^T F_t(x_t) - \lambda^\top \sum_{t=1}^T F_t(x'') \geq R(x', \lambda),$$

465 for any  $\lambda \in \mathcal{S}_2$ . Therefore, the multi-objective static regret

$$R_{\text{MOS}}(T) = \sup_{x^* \in \mathcal{X}^*} \inf_{\lambda \in \mathcal{S}_2} R(x^*, \lambda) \geq \inf_{\lambda \in \mathcal{S}_2} R(x'', \lambda) \geq \inf_{\lambda \in \mathcal{S}_2} R(x', \lambda) \geq v_1^2 T - 12,$$

466 which is also linear w.r.t.  $T$  for any  $x_1 = (u_1, v_1) \in \mathcal{X}$  such that  $v_1 > 0$ . ■

## 467 I Omitted Proofs of the Regret Bounds for DR-OMMD

### 468 I.1 Proof of Theorem 4.4

469 *Proof.* We start from the definition of  $R_{\text{MOS}}(T)$ . Specifically, for any  $\lambda \in \mathcal{S}_m$  and  $\lambda_1, \dots, \lambda_T \in \mathcal{S}_m$ ,  
470 it holds that

$$\begin{aligned} R_{\text{MOS}}(T) &= \sup_{x^* \in \mathcal{X}^*} \inf_{\lambda^* \in \mathcal{S}_m} \sum_{t=1}^T \lambda^{*\top} (F_t(x_t) - F_t(x^*)) \leq \sup_{x^* \in \mathcal{X}^*} \sum_{t=1}^T \lambda^\top (F_t(x_t) - F_t(x^*)) \\ &= \sum_{t=1}^T \left( (\lambda^\top F_t(x_t) - \lambda_t^\top F_t(x_t)) + \lambda_t^\top (F_t(x_t) - F_t(x^*)) + (\lambda_t^\top F_t(x^*) - \lambda^\top F_t(x^*)) \right) \\ &\leq \sum_{t=1}^T F \|\lambda - \lambda_t\|_1 + \sum_{t=1}^T \lambda_t^\top (F_t(x_t) - F_t(x^*)) + \sum_{t=1}^T F \|\lambda - \lambda_t\|_1 \\ &= 2F \sum_{t=1}^T \|\lambda - \lambda_t\|_1 + \sum_{t=1}^T \lambda_t^\top (F_t(x_t) - F_t(x^*)). \end{aligned}$$

471 To tackle the second term in the above inequality, we set  $u_1 = u_2 = \dots = u_T = x^*$  in Lemma I.2,  
472 which results in

$$\sum_{t=1}^T \lambda_t^\top (F_t(x_t) - F_t(x^*)) \leq \frac{1}{\eta} B_R(x^*, x_1) + \frac{\eta}{2} \sum_{t=1}^T \|\nabla F_t(x_t) \lambda_t\|_*^2.$$

473 Consequently, the static regret can be bounded as

$$\begin{aligned} R_{\text{MOS}}(T) &\leq 2F \sum_{t=1}^T \|\lambda_t - \lambda_0\|_1 + \frac{1}{\eta} B_R(x^*, x_1) + \frac{\eta}{2} \sum_{t=1}^T \|\nabla F_t(x_t) \lambda_t\|_*^2 \\ &= 2F \sum_{t=1}^T \|\lambda_t - \lambda_0\|_1 + \frac{1}{\eta} B_R(x^*, x_1) + \frac{\eta}{2} \sum_{t=1}^T \|\nabla F_t(x_t) \lambda_t\|_*^2 \\ &= \frac{1}{\eta} B_R(x^*, x_1) + \frac{\eta}{2} \sum_{t=1}^T (\|\nabla F_t(x_t) \lambda_t\|_*^2 + \frac{4F}{\eta} \|\lambda_t - \lambda_0\|_1), \end{aligned}$$

474 which proves the theorem. ■

## 475 I.2 Proof of Corollary E.1

476 *Proof.* We now set  $\alpha = \frac{4F}{\eta}$  in DR-OMMD, and specify  $\lambda_t$  to be the composition weights  
 477 generated by the algorithm at round  $t$ . The min-regularized-norm solver guarantees that  
 478  $\lambda_t \in \arg \min_{\lambda \in \Delta_t} \|\nabla F_t(x_t)\lambda\|_*^2 + \frac{4F}{\eta} \|\lambda - \lambda_0\|_1$ . In particular, we have  $\|\nabla F_t(x_t)\lambda_t\|_*^2 +$   
 479  $\frac{4F}{\eta} \|\lambda_t - \lambda_0\|_1 \leq \|\nabla F_t(x_t)\lambda_0\|_*^2$ . Therefore, from Theorem 4.4 we know that

$$R_{\text{MOS}}(T) \leq \frac{1}{\eta} B_R(x^*, x_1) + \frac{\eta}{2} \sum_{t=1}^T \|\nabla F_t(x_t)\lambda_0\|_*^2.$$

480 Recall that the domain of  $\mathcal{X}$  is bounded by  $D$ . From Assumption 4.2 we further have  $B_R(x^*, x_1) \leq$   
 481  $\gamma \|x^*, x_1\| \leq \gamma D$ . Utilize Assumption 4.3, and set  $\eta = \frac{\sqrt{2\gamma D}}{G\sqrt{T}}$ , then we have

$$R_{\text{MOS}}(T) \leq \frac{\gamma D}{\eta} + \frac{\eta}{2} G^2 T = G\sqrt{2\gamma DT},$$

482 which proves the reduced bound. ■

## 483 I.3 Proof of Lemma E.3

484 *Proof.* Before analyzing the dynamic regret bound of DR-OMMD, we first introduce two useful  
 485 lemmas.

486 **Lemma I.1.** *For the standard OMD algorithm with learning rate  $\eta$  and loss  $\lambda_t^\top F_t(x)$ , we have the*  
 487 *following recursion*

$$\lambda_t^\top F_t(x_t) - \lambda_t^\top F_t(x_t^*) \leq \frac{1}{\eta} (B_R(x_t^*; x_t) - B_R(x_t^*; x_{t+1})) + \frac{\eta}{2} \|\nabla F_t(x_t)\lambda_t\|_*^2, \quad (1)$$

488 for any  $t \in \{1, \dots, T\}$ .

489 *Proof.* Our proof is similar to the analysis of OMD in the single-objective setting [28, 7]. Specifically,  
 490 fix  $f_t = \lambda_t^\top F_t$  and  $g_t = \lambda_t^\top F_t(x_t)$ . From the convexity of  $f_t$ , we have

$$f_t(x_t) - f_t(x_t^*) \leq g_t^\top (x_t - x_t^*) = g_t^\top (x_{t+1} - x_t^*) + g_t^\top (x_t - x_{t+1}).$$

491 From the first-order optimal condition of  $x_{t+1}$ , for any  $x' \in \mathcal{X}$ , we have

$$(\eta \nabla F_t(x_t)\lambda_t + \nabla R(x_{t+1}) - \nabla R(x_t))^\top (x' - x_{t+1}) \geq 0.$$

492 We set  $x' = x_t^*$  in the above inequality, and consequently derive

$$f_t(x_t) - f_t(x_t^*) \leq \frac{1}{\eta} (\nabla R(x_{t+1}) - \nabla R(x_t))^\top (x_t^* - x_{t+1}) + g_t^\top (x_t - x_{t+1}).$$

493 Recall the definition of Bregman divergence  $B_R$ . We can check that (also see [2])

$$B_R(x_t^*, x_t) - B_R(x_t^*, x_{t+1}) - B_R(x_{t+1}, x_t) = (\nabla R(x_{t+1}) - \nabla R(x_t))^\top (x_t^* - x_{t+1}).$$

494 Since  $R$  is 1-strongly convex, we have  $B_R(x_{t+1}, x_t) \geq \|x_{t+1} - x_t\|^2/2$ . Hence

$$f_t(x_t) - f_t(x_t^*) \leq \frac{1}{\eta} (B_R(x_t^*, x_t) - B_R(x_t^*, x_{t+1}) - \frac{1}{2} \|x_{t+1} - x_t\|^2) + g_t^\top (x_t - x_{t+1}).$$

495 Moreover, from the Cauchy-Schwartz inequality we have

$$g_t^\top (x_t - x_{t+1}) \leq \frac{\eta}{2} \|g_t\|_*^2 + \frac{1}{2\eta} \|x_t - x_{t+1}\|^2.$$

496 Combining the above two inequalities, we can prove the lemma. ■

497 **Lemma I.2.** *For an arbitrary comparator sequence  $u_1, \dots, u_T \in \mathcal{X}$ , we have*

$$\sum_{t=1}^T \lambda_t^\top (F_t(x_t) - F_t(u_t)) \leq \frac{\gamma}{\eta} \sum_{t=1}^{T-1} \|u_t - u_{t+1}\| + \frac{1}{\eta} B_R(u_1, x_1) + \frac{\eta}{2} \sum_{t=1}^T \|\nabla F_t(x_t)\lambda_t\|_*^2$$



498 *Proof.* Summing the inequality in Lemma I.1 over  $t \in \{1, \dots, T\}$ , we have

$$\begin{aligned} \sum_{t=1}^T \lambda_t^\top (F_t(x_t) - F_t(u_t)) &\leq \sum_{t=1}^T \frac{1}{\eta} (B_R(u_t, x_t) - B_R(u_t, x_{t+1})) + \frac{\eta}{2} \|\nabla F_t(x_t) \lambda_t\|_*^2 \\ &\leq \frac{1}{\eta} \sum_{t=1}^{T-1} (B_R(u_{t+1}, x_{t+1}) - B_R(u_t, x_{t+1})) + \frac{1}{\eta} B_R(u_1, x_1) + \frac{\eta}{2} \|\nabla F_t(x_t) \lambda_t\|_*^2. \end{aligned}$$

499 Recall the assumption that  $B_R(x, z) - B_R(y, z) \leq \gamma \|x - y\|, \forall x, y, z \in \mathcal{X}$ . We then obtain

$$\sum_{t=1}^T \lambda_t^\top (F_t(x_t) - F_t(u_t)) \leq \frac{1}{\eta} \sum_{t=1}^{T-1} \gamma \|u_t - u_{t+1}\| + \frac{1}{\eta} B_R(u_1, x_1) + \frac{\eta}{2} \|\nabla F_t(x_t) \lambda_t\|_*^2,$$

500 which proves the lemma. ■

501 We can now return to prove Lemma E.3. Notice that, for an arbitrary comparator sequence  
502  $u_1, \dots, u_T \in \mathcal{X}$ , the multi-objective dynamic regret can be decomposed as

$$\begin{aligned} \sum_{t=1}^T \lambda_t^\top F_t(x_t) - \sum_{t=1}^T \lambda_t^\top F_t(x_t^*) &= \underbrace{\sum_{t=1}^T \lambda_t^\top F_t(x_t) - \sum_{t=1}^T \lambda_t^\top F_t(u_t)}_{\text{term A}} + \underbrace{\sum_{t=1}^T \lambda_t^\top F_t(u_t) - \sum_{t=1}^T \lambda_t^\top F_t(x_t^*)}_{\text{term B}}. \end{aligned}$$

503 We now instantiate the comparator sequence to be a piece-wise stationary sequence, i.e.,

$$\{u_1, \dots, u_T\} = \left\{ \underbrace{w_{\mathcal{I}_1}^*, \dots, w_{\mathcal{I}_1}^*}_{\Delta \text{ times}}, \dots, \underbrace{w_{\mathcal{I}_{\lceil \frac{T}{\Delta} \rceil - 1}}^*, \dots, w_{\mathcal{I}_{\lceil \frac{T}{\Delta} \rceil - 1}}^*}_{\Delta \text{ times}}, \underbrace{w_{\mathcal{I}_{\lceil \frac{T}{\Delta} \rceil}}^*, \dots, w_{\mathcal{I}_{\lceil \frac{T}{\Delta} \rceil}}^*}_{(1 + \frac{T}{\Delta} - \lceil \frac{T}{\Delta} \rceil) \Delta \text{ times}} \right\},$$

504 which starts with  $w_1^*$  and only changes for every  $\Delta$  steps ( $\Delta$  is an integer such that  $\Delta \leq T$ ). More  
505 specifically, for any  $i \in \{1, \dots, \lceil T/\Delta \rceil\}$ , denote  $p_i = (i-1)\Delta + 1$  and  $q_i = i\Delta$ , and then  
506  $\mathcal{I}_i = [p_i, q_i]$  is exactly the  $i$ -th stationary piece of the comparator sequence.

507 For any piece  $i \in \{1, \dots, \lceil T/\Delta \rceil\}$ , we set all  $u_t, t \in \mathcal{I}_i$  to be the best fixed decision  $x_{\mathcal{I}_i}^*$  regarding  
508 the cumulative linearized losses during interval  $\mathcal{I}_i$ , i.e.,  $u_t \equiv x_{\mathcal{I}_i}^* = \arg \min_{x \in \mathcal{X}} \sum_{t \in \mathcal{I}_i} \lambda_t^\top F_t(x)$ ,  
509 for any  $t \in \mathcal{I}_i, i \in \{1, \dots, \lceil T/\Delta \rceil\}$ . Then we can apply Lemma I.2 to such comparator sequence  
510 and bound the term A as

$$\begin{aligned} A &\leq \frac{\gamma}{\eta} \sum_{i=1}^{\lceil T/\Delta \rceil - 1} \|u_{\mathcal{I}_i} - u_{\mathcal{I}_{i+1}}\| + \frac{1}{\eta} B_R(u_{\mathcal{I}_1}, x_1) + \frac{\eta}{2} \sum_{t=1}^T \|\nabla F_t(x_t) \lambda_t\|_*^2 \\ &\leq \frac{\gamma}{\eta} (\lceil \frac{T}{\Delta} \rceil - 1) D + \frac{\gamma D}{\eta} + \frac{\eta}{2} \sum_{t=1}^T \|\nabla F_t(x_t) \lambda_t\|_*^2 = \frac{\gamma D}{\eta} \lceil \frac{T}{\Delta} \rceil + \frac{\eta}{2} \sum_{t=1}^T \|\nabla F_t(x_t) \lambda_t\|_*^2. \end{aligned}$$

511 Notice that, the second term B measures the difference between the cumulative linearized loss of the  
512 best decisions  $x_{\mathcal{I}_i}^*$  regarding each interval  $\mathcal{I}_i$  and that of the comparators  $\{x_t^*\}$ . To analyze this term,  
513 we consider such difference  $B_i$  restricted to any interval  $\mathcal{I}_i, i \in \{1, \dots, \lceil T/\Delta \rceil\}$ :

$$\begin{aligned} B_i &= \sum_{t \in \mathcal{I}_i} \lambda_t^\top F_t(u_t) - \sum_{t \in \mathcal{I}_i} \lambda_t^\top F_t(x_t^*) \\ &= \sum_{t \in \mathcal{I}_i} \lambda_t^\top F_t(u_t) - \sum_{t \in \mathcal{I}_i} \lambda_{p_i}^\top F_{p_i}(x_{p_i}^*) + \sum_{t \in \mathcal{I}_i} \lambda_{p_i}^\top F_{p_i}(x_{p_i}^*) - \sum_{t \in \mathcal{I}_i} \lambda_t^\top F_t(x_t^*). \end{aligned}$$

514 Recall our definition of  $u_t$  and  $x_t^*$ , then we have  $\sum_{t \in \mathcal{I}_i} \lambda_t^\top F_t(u_t) \leq \sum_{t \in \mathcal{I}_i} \lambda_t^\top F_t(x_{p_i}^*)$  and  
 515  $\lambda_{p_i}^\top F_{p_i}(x_{p_i}^*) \leq \lambda_{p_i}^\top F_{p_i}(x_t^*)$ . Hence we further have

$$B_i \leq \sum_{t \in \mathcal{I}_i} \lambda_t^\top F_t(x_{p_i}^*) - \sum_{t \in \mathcal{I}_i} \lambda_{p_i}^\top F_{p_i}(x_{p_i}^*) + \sum_{t \in \mathcal{I}_i} \lambda_{p_i}^\top F_{p_i}(x_t^*) - \sum_{t \in \mathcal{I}_i} \lambda_t^\top F_t(x_t^*).$$

516 Moreover, for any  $t \in \mathcal{I}_i, x \in \mathcal{X}$ , we have

$$|\lambda_t^\top F_t(x) - \lambda_{p_i}^\top F_{p_i}(x)| = \left| \sum_{k=p_i}^{t-1} (\lambda_{k+1}^\top F_{k+1}(x) - \lambda_k^\top F_k(x)) \right| \leq \sum_{k=p_i}^{q_i} \sup_{x \in \mathcal{X}} |\lambda_k^\top F_k(x) - \lambda_{k+1}^\top F_{k+1}(x)|.$$

517 Recall that  $\mathcal{I}_i$  has at most  $\Delta$  elements, we further have

$$B_i \leq 2\Delta \sum_{k=p_i}^{q_i} \sup_{x \in \mathcal{X}} |\lambda_k^\top F_k(x) - \lambda_{k+1}^\top F_{k+1}(x)|.$$

518 Hence the term  $B$  can be bounded as

$$B = \sum_{i=1}^{\lceil T/\Delta \rceil} B_i \leq 2\Delta \sum_{i=1}^{\lceil T/\Delta \rceil} \sum_{k=p_i}^{q_i} \sup_{x \in \mathcal{X}} |\lambda_k^\top F_k(x) - \lambda_{k+1}^\top F_{k+1}(x)|.$$

519 From the definition of  $p_i$  and  $q_i$ , we further have

$$B \leq 2\Delta \sum_{t=1}^{T-1} \sup_{x \in \mathcal{X}} |\lambda_t^\top F_t(x) - \lambda_{t+1}^\top F_{t+1}(x)|.$$

520 Combining the above two inequalities on terms  $A$  and  $B$ , we derive

$$\begin{aligned} R_{\text{MOD}}(T) &\leq \frac{\gamma}{\eta} \sum_{i=1}^{\lceil T/\Delta \rceil - 1} \|u_{\mathcal{I}_i} - u_{\mathcal{I}_{i+1}}\| + \frac{1}{\eta} B_R(u_{\mathcal{I}_1}, x_1) + \frac{\eta}{2} \sum_{t=1}^T \|\nabla F_t(x_t) \lambda_t\|_*^2 \\ &\quad + 2\Delta \sum_{t=1}^{T-1} \sup_{x \in \mathcal{X}} |\lambda_t^\top F_t(x) - \lambda_{t+1}^\top F_{t+1}(x)|. \end{aligned}$$

521 We note that, term  $\sum_{t=1}^{T-1} \sup_{x \in \mathcal{X}} |\lambda_t^\top F_t(x) - \lambda_{t+1}^\top F_{t+1}(x)|$  in the above regret bound is analogous  
 522 to the term  $\sum_{t=1}^{T-1} \sup_{x \in \mathcal{X}} |f_t(x) - f_{t+1}(x)|$  in the dynamic regret analysis for the single-objective  
 523 setting. Note that, in the single-objective setting, from the definition of temporal variability, we  
 524 directly have  $\sum_{t=1}^{T-1} \sup_{x \in \mathcal{X}} |f_t(x) - f_{t+1}(x)| \leq V_T$ . However, things become much more complex  
 525 in the multi-objective setting, since **the vector loss  $F_t(x)$  is now coupled with the composite**  
 526 **weights  $\lambda_t$** . As a result, we cannot directly use the temporal variability of each loss component to  
 527 bound this term. To tackle this term, we introduce the following lemma which is highly non-trivial.

528 **Lemma I.3.** *For DR-OMMD with any initial weights  $\lambda_0 \in \mathcal{S}_m$ , it holds that*

$$\sum_{t=1}^{T-1} \sup_{x \in \mathcal{X}} |\lambda_t^\top F_t(x) - \lambda_{t+1}^\top F_{t+1}(x)| \leq 2F \sum_{t=1}^T \|\lambda_t - \lambda_0\|_1 + V_T.$$

529 *Proof.* We decompose the supremum operation as

$$\begin{aligned} &\sum_{t=1}^{T-1} \sup_{x \in \mathcal{X}} |\lambda_t^\top F_t(x) - \lambda_{t+1}^\top F_{t+1}(x)| \\ &\leq \sum_{t=1}^{T-1} \sup_{x \in \mathcal{X}} (|(\lambda_t - \lambda_{t+1})^\top F_{t+1}(x)| + |\lambda_t^\top (F_t(x) - F_{t+1}(x))|) \\ &\leq \sum_{t=1}^{T-1} \sup_{x \in \mathcal{X}} |(\lambda_t - \lambda_{t+1})^\top F_{t+1}(x)| + \sum_{t=1}^{T-1} \sup_{x \in \mathcal{X}} |\lambda_t^\top (F_t(x) - F_{t+1}(x))|. \end{aligned}$$

530 Then for any  $x \in \mathcal{X}$ ,  $|f_t^i(x)| \leq F$ , and consequently

$$\sum_{t=1}^{T-1} \sup_{x \in \mathcal{X}} |(\lambda_t - \lambda_{t+1})^\top F_{t+1}(x)| \leq \sum_{t=1}^{T-1} \|\lambda_t - \lambda_{t+1}\|_1 \|F_{t+1}(x)\|_\infty \leq 2F \sum_{t=1}^{T-1} \|\lambda_t - \lambda_{t+1}\|_1.$$

531 It then remains to tackle the term  $\sum_{t=1}^{T-1} \sup_{x \in \mathcal{X}} |\lambda_t^\top (F_t(x) - F_{t+1}(x))|$ . For any  $\lambda_0 = (\lambda_0^1, \dots, \lambda_0^m) \in \mathcal{S}_m$ , we can decompose this term as

$$\begin{aligned} & \sum_{t=1}^{T-1} \sup_{x \in \mathcal{X}} |\lambda_t^\top (F_t(x) - F_{t+1}(x))| \\ &= \sum_{t=1}^{T-1} \sup_{x \in \mathcal{X}} |(\lambda_t - \lambda_0)^\top (F_t(x) - F_{t+1}(x)) + \lambda_0^\top (F_t(x) - F_{t+1}(x))| \\ &\leq \underbrace{\sum_{t=1}^{T-1} \sup_{x \in \mathcal{X}} |(\lambda_t - \lambda_0)^\top (F_t(x) - F_{t+1}(x))|}_{\text{term A}} + \underbrace{\sum_{t=1}^{T-1} \sup_{x \in \mathcal{X}} |\lambda_0^\top (F_t(x) - F_{t+1}(x))|}_{\text{term B}}. \end{aligned}$$

533 Since we have assumed that  $|f_t^i(x)| \leq F$  for any  $x \in \mathcal{X}, t \in \{1, \dots, T\}, i \in \{1, \dots, m\}$ , it holds  
534 that  $|f_t^i(x) - f_{t+1}^i(x)| \leq 2F$ . Consequently, we can bound the term A as

$$\begin{aligned} \text{term A} &= \sum_{t=1}^{T-1} \sup_{x \in \mathcal{X}} \left| \sum_{i=1}^m (\lambda_t^i - \lambda_0^i) (f_t^i(x) - f_{t+1}^i(x)) \right| \\ &\leq \sum_{t=1}^{T-1} \sup_{x \in \mathcal{X}} \sum_{i=1}^m |\lambda_t^i - \lambda_0^i| \cdot |f_t^i(x) - f_{t+1}^i(x)| \\ &\leq \sum_{t=1}^{T-1} \sum_{i=1}^m |\lambda_t^i - \lambda_0^i| \cdot \sup_{x \in \mathcal{X}} |f_t^i(x) - f_{t+1}^i(x)| \\ &\leq \sum_{t=1}^{T-1} \sum_{i=1}^m |\lambda_t^i - \lambda_0^i| \cdot 2F = \sum_{t=1}^{T-1} 2F \|\lambda_t - \lambda_0\|_1, \end{aligned}$$

535 where  $\lambda_t^i$  and  $\lambda_0^i$  represents the  $i$ -th entry of  $\lambda_t$  and  $\lambda_0$ , respectively.

536 As for term B, we have

$$\begin{aligned} \text{term B} &= \sum_{t=1}^{T-1} \sup_{x \in \mathcal{X}} |\lambda_0^\top (F_t(x) - F_{t+1}(x))| \leq \sum_{t=1}^{T-1} \sup_{x \in \mathcal{X}} \sum_{i=1}^m \lambda_0^i \cdot |f_t^i(x) - f_{t+1}^i(x)| \\ &\leq \sum_{i=1}^m \lambda_0^i \cdot \sum_{t=1}^{T-1} \sup_{x \in \mathcal{X}} |f_t^i(x) - f_{t+1}^i(x)| \leq \sum_{i=1}^m \lambda_0^i \cdot V_T = V_T, \end{aligned}$$

537 where the last inequality is derived from the assumption of temporal variability. Combining the above  
538 bounds for term A and term B, we finally prove the lemma. ■

539 Assume that the diameter of the decision domain  $\mathcal{X}$  is upper bounded by some  $D > 0$ , then  
540  $\|u_{\mathcal{I}_i} - u_{\mathcal{I}_{i+1}}\| \leq D$  and  $B_R(u_{\mathcal{I}_1}, x_1) \leq \gamma \|u_{\mathcal{I}_1} - x_1\| \leq \gamma D$ . Hence we have

$$\frac{\gamma}{\eta} \sum_{i=1}^{\lceil T/\Delta \rceil - 1} \|u_{\mathcal{I}_i} - u_{\mathcal{I}_{i+1}}\| + \frac{1}{\eta} B_R(u_{\mathcal{I}_1}, x_1) \leq \frac{\gamma D}{\eta} (\lceil T/\Delta \rceil - 1) + \frac{\gamma D}{\eta} = \frac{\gamma D}{\eta} \lceil \frac{T}{\Delta} \rceil.$$

541 Plugging the above result and lemma into the above bound for  $R_{\text{MOD}}(T)$ , and replace the quantity  
542  $\Delta \in \{1, \dots, T\}$  by  $\delta$ , we have

$$R_{\text{MOD}}(T) \leq 2\delta V_T + 4\delta F \sum_{t=1}^T \|\lambda_t - \lambda_0\|_1 + \frac{\eta}{2} \sum_{t=1}^T \|\nabla F_t(x_t) \lambda_t\|_*^2 + \frac{\gamma D}{\eta} \lceil \frac{T}{\delta} \rceil,$$

543 for any  $\delta \in \{1, \dots, T\}$ . We thus prove the lemma. ■

#### 544 I.4 Proof of Theorem 4.6

545 *Proof.* This theorem can be directly derived from Lemma E.3.

546 Specifically, when  $\frac{4V_T}{G^2T} \leq \eta \leq \frac{4V_T}{G^2}$ , we can set  $\delta = \frac{\eta G^2T}{V_T}$ , which satisfies  $1 \leq \delta \leq T$ . Plugging it  
547 into Lemma E.3 and rearranging the inequality, we can directly derive the theorem. ■

#### 548 I.5 Proof of Theorem E.4

549 *Proof.* Since this theorem is a special case of its following Theorem E.5 when  $\Omega(1) \leq V_T \leq o(T)$ ,  
550 it can be proved as we derive Theorem E.5 in the following subsection.

551 In fact, as we assume  $\Omega(1) \leq V_T \leq o(T)$ , in the following derivation of Theorem E.5, we are  
552 always in the case of (i). In addition, when  $\Omega(1) \leq V_T \leq o(T)$  in Theorem E.5 we exactly have  
553  $\eta = \frac{2}{G}(\frac{\gamma DV_T}{GT})^{1/3}$ . Hence this theorem can be directly derived from Theorem E.5. ■

#### 554 I.6 Proof of Theorem E.5

555 *Proof.* Denote  $\eta_0 = \frac{2}{G}(\frac{\gamma DV_T}{GT})^{1/3}$ . We consider the following three cases:

556 (i) When  $\frac{4V_T}{G^2T} \leq \eta_0 \leq \frac{4V_T}{G^2}$ , we can directly apply the above lemma.

557 (ii) When  $\eta_0 < \frac{4V_T}{G^2T}$ , or equivalently  $V_T > (\frac{\gamma D}{8})^{1/2}GT$ , we have  $\eta = \frac{4V_T}{G^2T}$ . Set  $\delta = 1$  in Lemma  
558 E.3, then it can be verified that

$$\begin{aligned} R_{\text{MOD}}(T) &\leq 2V_T + \frac{2V_T}{G^2T} \sum_{t=1}^T (\alpha \|\lambda_t - \lambda_0\|_1 + \|\nabla F_t(x_t)\lambda_t\|_*^2) + \frac{\gamma DG^2T^2}{4V_T} \\ &\leq 4V_T + \frac{2V_T}{G^2T} \sum_{t=1}^T \|\nabla F_t(x_t)\lambda_0\|_*^2 \\ &\leq 4V_T + \frac{2V_T}{G^2T} \sum_{t=1}^T G^2 = 6V_T. \end{aligned}$$

559 (iii) When  $\eta_0 > \frac{4V_T}{G^2}$ , or equivalently  $V_T < (\frac{\gamma D}{8})^{1/2}G$ , we have  $\eta = \frac{4V_T}{G^2}$ . Set  $\delta = T$  in Lemma E.3,  
560 then it can be verified that

$$\begin{aligned} R_{\text{MOD}}(T) &\leq 2TV_T + \frac{2V_T}{G^2} \sum_{t=1}^T (\alpha \|\lambda_t - \lambda_0\|_1 + \|\nabla F_t(x_t)\lambda_t\|_*^2) + \frac{\gamma DG^2}{4V_T} \\ &\leq G(2\gamma D)^{1/2}T^{1/2} + \frac{2V_T}{G^2} \sum_{t=1}^T \|\nabla F_t(x_t)\lambda_0\|_*^2 \\ &\leq G(2\gamma D)^{1/2}T^{1/2} + \frac{2V_T}{G^2} \sum_{t=1}^T G^2 \leq \frac{3G}{2}(2\gamma D)^{1/2}T^{1/2}. \end{aligned}$$

561 Combining (i)-(iii), we prove the theorem. ■

#### 562 I.7 Proof of Corollary E.2

563 *Proof.* Since this corollary is a special case of its following Corollary E.6 when  $\Omega(1) \leq V_T \leq o(T)$ ,  
564 it can be directly derived from Corollary E.6.

565 Specifically, since  $V_T \geq \Omega(1)$ , we have  $V_T^{1/3}T^{2/3} \geq O(T^{1/2})$ . Moreover, since  $V_T \leq o(T)$ , we  
566 have  $V_T^{1/3}T^{2/3} \geq o(V_T)$ . Therefore, the dominating term in the bound of Corollary E.6 is  $V_T^{1/3}T^{2/3}$ ,  
567 which proves the corollary. ■

## 568 I.8 Proof of Corollary E.6

569 *Proof.* We start from the general bound derived in Theorem E.5. Specifically, in the first regret term,  
 570 since  $\lambda_t$  is selected to minimize  $\alpha\|\lambda_t - \lambda_{t-1}\|_1 + \|\nabla F_t(x_t)\lambda_t\|_2^*$  at each step  $t$ , we further have

$$\min_{\lambda \in \mathcal{S}_m} \{\alpha\|\lambda - \lambda_{t-1}\|_1 + \|\nabla F_t(x_t)\lambda\|_2^*\} \leq \|\nabla F_t(x_t)\lambda_{t-1}\|_2^* \leq (\|\lambda_{t-1}\|_1 \|\nabla F_t(x_t)\|_\infty)^2 \leq G^2.$$

571 Plugging it into the bound in Theorem E.5 directly proves the corollary.  $\blacksquare$

## 572 J Omitted Proofs of the Regret Bounds for A-DR-OMMD

573 The proofs of A-DR-OMMD are very similar to the proofs of DR-OMMD in Appendix I, except that  
 574 we replace the fixed learning rate  $\eta$  by the adaptive ones  $\eta_t$ . For conciseness, we here only highlight  
 575 the different steps from the proofs of DR-OMMD.

### 576 J.1 Proof of Theorem D.2

577 *Proof.* For any  $\lambda \in \mathcal{S}_m$  and  $\lambda_1, \dots, \lambda_T \in \mathcal{S}_m$ , by the same deduction in the proof of Theorem 4.4 in  
 578 Appendix I.1, we have

$$R_{\text{MOS}}(T) \leq 2F \sum_{t=1}^T \|\lambda - \lambda_t\|_1 + \sum_{t=1}^T \lambda_t^\top (F_t(x_t) - F_t(x^*)).$$

579 To proceed, we introduce two lemmas, which are the analogies of Lemma I.1 and I.2 in Appendix I.3.

580 **Lemma J.1.** *For the standard OMD algorithm with non-increasing learning rates  $\eta_t$  and loss*  
 581  *$\lambda_t^\top F_t(x)$ , we have the following recursion*

$$\lambda_t^\top F_t(x_t) - \lambda_t^\top F_t(x_t^*) \leq \frac{1}{\eta_t} (B_R(x_t^*; x_t) - B_R(x_t^*; x_{t+1})) + \frac{\eta_t}{2} \|\nabla F_t(x_t)\lambda_t\|_*^2, \quad (2)$$

582 *for any  $t \in \{1, \dots, T\}$ .*

583 *Proof.* Since the lemma is only regarding any single round  $t$ , the proof is nearly the same as the proof  
 584 of Lemma I.1 in Appendix I.3. In fact, we just need to replace all  $\lambda$  in the proof of Lemma I.1 by  $\lambda_t$ ,  
 585 then we recover the proof of this lemma.  $\blacksquare$

586 **Lemma J.2.** *For an arbitrary comparator sequence  $u_1, \dots, u_T \in \mathcal{X}$ , we have*

$$\sum_{t=1}^T \lambda_t^\top (F_t(x_t) - F_t(u_t)) \leq \frac{\gamma D}{\eta_T} + \sum_{t=1}^{T-1} \frac{\gamma}{\eta_t} \|u_t - u_{t+1}\| + \sum_{t=1}^T \frac{\eta_t}{2} \|\nabla F_t(x_t)\lambda_t\|_*^2.$$

587 *Proof.* Summing the inequality in Lemma J.1 over  $t \in \{1, \dots, T\}$ , we have

$$\sum_{t=1}^T \lambda_t^\top (F_t(x_t) - F_t(u_t)) \leq \sum_{t=1}^T \frac{1}{\eta_t} (B_R(u_t, x_t) - B_R(u_t, x_{t+1})) + \sum_{t=1}^T \frac{\eta_t}{2} \|\nabla F_t(x_t)\lambda_t\|_*^2.$$

588 Since the Bregman divergence is always non-negative, we have

$$\begin{aligned} & \sum_{t=1}^T \frac{1}{\eta_t} (B_R(u_t, x_t) - B_R(u_t, x_{t+1})) \\ & \leq \sum_{t=1}^{T-1} \left( \frac{1}{\eta_{t+1}} B_R(u_{t+1}, x_{t+1}) - \frac{1}{\eta_t} B_R(u_t, x_{t+1}) \right) + \frac{1}{\eta_1} B_R(u_1, x_1). \end{aligned}$$

589 Now we consider each summation term. Since  $\{\eta_t\}_{t=1}^T$  is non-increasing, we have  $\frac{1}{\eta_t} \leq \frac{1}{\eta_{t+1}}$ , hence

$$\begin{aligned} & \frac{1}{\eta_{t+1}} B_R(u_{t+1}, x_{t+1}) - \frac{1}{\eta_t} B_R(u_t, x_{t+1}) \\ & = \left( \frac{1}{\eta_{t+1}} - \frac{1}{\eta_t} \right) B_R(u_{t+1}, x_{t+1}) + \frac{1}{\eta_t} (B_R(u_{t+1}, x_{t+1}) - B_R(u_t, x_{t+1})) \end{aligned}$$

590 Recall the assumption that  $B_R(x, z) - B_R(y, z) \leq \gamma\|x - y\|, \forall x, y, z \in \mathcal{X}$ . We then obtain  
 591  $B_R(u_{t+1}, x_{t+1}) - B_R(u_t, x_{t+1}) \leq \gamma\|u_{t+1} - u_t\|$  and  $B_R(u_{t+1}, x_{t+1}) \leq \gamma D$ . Hence

$$\frac{1}{\eta_{t+1}}B_R(u_{t+1}, x_{t+1}) - \frac{1}{\eta_t}B_R(u_t, x_{t+1}) \leq \left(\frac{1}{\eta_{t+1}} - \frac{1}{\eta_t}\right)\gamma D + \frac{1}{\eta_t}\gamma\|u_t - u_{t+1}\|.$$

592 Plugging it into the desired formula, we have

$$\sum_{t=1}^T \lambda_t^\top (F_t(x_t) - F_t(u_t)) \leq \frac{\gamma D}{\eta_T} + \sum_{t=1}^{T-1} \frac{\gamma}{\eta_t} \|u_t - u_{t+1}\| + \sum_{t=1}^T \frac{\eta_t}{2} \|\nabla F_t(x_t) \lambda_t\|_*^2,$$

593 which proves the lemma. ■

594 Now set  $u_1 = u_2 = \dots = u_T = x^*$  in Lemma J.2, we have

$$\sum_{t=1}^T \lambda_t^\top (F_t(x_t) - F_t(x^*)) \leq \frac{\gamma D}{\eta_T} + \sum_{t=1}^T \frac{\eta_t}{2} \|\nabla F_t(x_t) \lambda_t\|_*^2.$$

595 Consequently, the static regret can be bounded as

$$\begin{aligned} R_{\text{MOS}}(T) &\leq 2F \sum_{t=1}^T \|\lambda_t - \lambda_0\|_1 + \frac{\gamma D}{\eta_T} + \sum_{t=1}^T \frac{\eta_t}{2} \|\nabla F_t(x_t) \lambda_t\|_*^2 \\ &= \frac{\gamma D}{\eta_T} + \sum_{t=1}^T \frac{\eta_t}{2} (\|\nabla F_t(x_t) \lambda_t\|_*^2 + \frac{4F}{\eta_t} \|\lambda_t - \lambda_0\|_1), \end{aligned}$$

596 which proves the theorem. ■

### 597 J.2 Proof of Corollary D.3

598 *Proof.* In A-DR-OMMD, when  $\alpha_t = \frac{4F}{\eta_t}$ , from the formulation of  $\lambda_t$  we have

$$\begin{aligned} R_{\text{MOS}}(T) &= \frac{\gamma D}{\eta_T} + \sum_{t=1}^T \frac{\eta_t}{2} \min_{\lambda \in \mathcal{S}_m} \{\|\nabla F_t(x_t) \lambda\|_*^2 + \alpha_t \|\lambda - \lambda_0\|_1\} \\ &\leq \frac{\gamma D}{\eta_T} + \sum_{t=1}^T \frac{\eta_t}{2} \|\nabla F_t(x_t) \lambda_0\|_*^2 \leq \frac{\gamma D}{\eta_T} + \frac{G^2}{2} \sum_{t=1}^T \eta_t. \end{aligned}$$

599 When  $\eta_t = \frac{\sqrt{2\gamma D}}{G\sqrt{t}}$ , we further have

$$R_{\text{MOS}}(T) \leq G\sqrt{2\gamma DT},$$

600 which proves corollary. ■

### 601 J.3 Proof of Theorem D.4

602 Similar to the proof of Theorem 4.6, before analyzing the dynamic regret of A-DR-OMMD, we first  
 603 introduce a lemma, which is an analogy to Lemma E.3 with adaptive  $\eta_t$  and  $\alpha_t$ .

604 **Lemma J.3.** Suppose the assumptions of Lemma E.3 hold. Then for any  $\lambda_0 \in \mathcal{S}_m, \Delta \in \{1, \dots, T\}$ ,  
 605 and non-increasing  $\{\eta_t\}_{t=1}^T$ , DR-OMMD attains the following dynamic regret

$$R_{\text{MOD}}(T) \leq \lceil \frac{T}{\Delta} \rceil \frac{\gamma D}{\eta_T} + \sum_{t=1}^T \frac{\eta_t}{2} \|\nabla F_t(x_t) \lambda_t\|_*^2 + 4\Delta F \sum_{t=1}^T \|\lambda_t - \lambda_0\|_1 + 2\Delta V_T.$$

606 *Proof.* Similar to the proof of Lemma E.3, we decompose the regret as

$$\begin{aligned} &\sum_{t=1}^T \lambda_t^\top F_t(x_t) - \sum_{t=1}^T \lambda_t^\top F_t(x_t^*) \\ &= \underbrace{\sum_{t=1}^T \lambda_t^\top F_t(x_t) - \sum_{t=1}^T \lambda_t^\top F_t(u_t)}_{\text{term A}} + \underbrace{\sum_{t=1}^T \lambda_t^\top F_t(u_t) - \sum_{t=1}^T \lambda_t^\top F_t(x_t^*)}_{\text{term B}}, \end{aligned}$$

607 and construct a comparator sequence

$$\{u_1, \dots, u_T\} = \left\{ \underbrace{w_{\mathcal{I}_1}^*, \dots, w_{\mathcal{I}_1}^*}_{\Delta \text{ times}}, \underbrace{w_{\mathcal{I}_{\lceil \frac{T}{\Delta} \rceil - 1}}^*, \dots, w_{\mathcal{I}_{\lceil \frac{T}{\Delta} \rceil - 1}}^*}_{\Delta \text{ times}}, \underbrace{w_{\mathcal{I}_{\lceil \frac{T}{\Delta} \rceil}}^*, \dots, w_{\mathcal{I}_{\lceil \frac{T}{\Delta} \rceil}}^*}_{(1 + \frac{T}{\Delta} - \lceil \frac{T}{\Delta} \rceil) \Delta \text{ times}} \right\}.$$

608 For any  $i \in \{1, \dots, \lceil T/\Delta \rceil\}$ , denote  $p_i = (i-1)\Delta + 1$  and  $q_i = i\Delta$ . Then  $\mathcal{I}_i = [p_i, q_i]$  is the  $i$ -th  
 609 stationary piece of the comparator sequence. For any  $i \in \{1, \dots, \lceil T/\Delta \rceil\}$ , we set all  $u_t, t \in \mathcal{I}_i$  to be  
 610  $x_{\mathcal{I}_i}^* = \arg \min_{x \in \mathcal{X}} \sum_{t \in \mathcal{I}_i} \lambda_t^\top F_t(x)$ . Then we can apply Lemma J.2 to bound the term  $A$  as

$$\begin{aligned} A &\leq \sum_{i=1}^{\lceil T/\Delta \rceil - 1} \frac{\gamma}{\eta_{p_i}} \|u_{\mathcal{I}_i} - u_{\mathcal{I}_{i+1}}\| + \frac{\gamma D}{\eta_T} + \sum_{t=1}^T \frac{\eta_t}{2} \|\nabla F_t(x_t) \lambda_t\|_*^2 \\ &\leq \gamma D \left( \frac{1}{\eta_T} + \sum_{i=1}^{\lceil T/\Delta \rceil - 1} \frac{1}{\eta_{p_i}} \right) + \sum_{t=1}^T \frac{\eta_t}{2} \|\nabla F_t(x_t) \lambda_t\|_*^2. \end{aligned}$$

611 Since  $\{\eta_t\}_{t=1}^T$  is non-increasing, we further have

$$A \leq \lceil \frac{T}{\Delta} \rceil \frac{\gamma D}{\eta_T} + \sum_{t=1}^T \frac{\eta_t}{2} \|\nabla F_t(x_t) \lambda_t\|_*^2.$$

612 The analysis of the term  $B$  is the same as that in the proof of Lemma E.3, i.e.,

$$B \leq 2\Delta \sum_{t=1}^{T-1} \sup_{x \in \mathcal{X}} |\lambda_t^\top F_t(x) - \lambda_{t+1}^\top F_{t+1}(x)|.$$

613 We can further apply Lemma I.3 to the term  $B$  and derive

$$B \leq 4\Delta F \sum_{t=1}^T \|\lambda_t - \lambda_0\|_1 + 2\Delta V_T.$$

614 Combining the above two inequalities, we have

$$R_{\text{MOD}}(T) \leq \lceil \frac{T}{\Delta} \rceil \frac{\gamma D}{\eta_T} + \sum_{t=1}^T \frac{\eta_t}{2} \|\nabla F_t(x_t) \lambda_t\|_*^2 + 4\Delta F \sum_{t=1}^T \|\lambda_t - \lambda_0\|_1 + 2\Delta V_T,$$

615 which proves the lemma. ■

616 Now we can go back to prove Theorem D.4.

617 *Proof of Theorem D.4.* We start from the general bound in Lemma J.3. Set  $\Delta = \frac{\eta_T G^2 T}{V_T}$ , then

$$R_{\text{MOD}}(T) \leq \frac{\gamma D V_T}{G^2 \eta_T^2} + \sum_{t=1}^T \frac{\eta_t}{2} \|\nabla F_t(x_t) \lambda_t\|_*^2 + \frac{4\eta_T G^2 F T}{V_T} \sum_{t=1}^T \|\lambda_t - \lambda_0\|_1 + 2\eta_T G^2 T,$$

618 which proves the theorem. ■

#### 619 J.4 Proof of Corollary D.5

620 *Proof.* When  $\alpha_t = \frac{8G^2 F T}{V_T} (\frac{\eta_T}{\eta_t})$ , from the formulation of  $\lambda_t$ , we have

$$\begin{aligned} R_{\text{MOD}}(T) &\leq \frac{\gamma D V_T}{G^2 \eta_T^2} + \sum_{t=1}^T \frac{\eta_t}{2} \arg \min_{\lambda \in \mathcal{S}_m} \{\|\nabla F_t(x_t) \lambda\|_*^2 + \alpha_t \|\lambda - \lambda_0\|_1\} + 2\eta_T G^2 T \\ &\leq \frac{\gamma D V_T}{G^2 \eta_T^2} + \sum_{t=1}^T \frac{\eta_t}{2} \|\nabla F_t(x_t) \lambda_0\|_*^2 + 2\eta_T G^2 T \\ &\leq \frac{\gamma D V_T}{G^2 \eta_T^2} + \frac{G^2}{2} \sum_{t=1}^T \eta_t + 2\eta_T G^2 T. \end{aligned}$$

When  $\eta_t = \frac{1}{G}(\frac{\gamma DV_T}{Gt})^{1/3}$ , since by induction we can prove that  $\sum_{t=1}^T (\frac{1}{t})^{1/3} \leq 2T^{2/3}$ , we have

$$R_{\text{MOD}}(T) \leq O(T^{2/3}V_T^{1/3}),$$

which proves the corollary. ■

## References

- [1] Jacob Abernethy, Peter L Bartlett, and Elad Hazan. Blackwell approachability and no-regret learning are equivalent. In *Annual Conference on Learning Theory*, pages 27–46, 2011.
- [2] Amir Beck and Marc Teboulle. Mirror descent and nonlinear projected subgradient methods for convex optimization. *Operations Research Letters*, 31(3):167–175, 2003.
- [3] Omar Besbes, Yonatan Gur, and Assaf Zeevi. Non-stationary stochastic optimization. *Operations Research*, 63(5):1227–1244, 2015.
- [4] David Blackwell. An analog of the minimax theorem for vector payoffs. *Pacific Journal of Mathematics*, 6(1):1–8, 1956.
- [5] Róbert Busa-Fekete, Balázs Szörényi, Paul Weng, and Shie Mannor. Multi-objective bandits: Optimizing the generalized gini index. In *International Conference on Machine Learning*, pages 625–634. PMLR, 2017.
- [6] Nicolò Campolongo and Francesco Orabona. A closer look at temporal variability in dynamic online learning. *arXiv preprint arXiv:2102.07666*, 2021.
- [7] Nicolò Cesa-bianchi, Pierre Gaillard, Gabor Lugosi, and Gilles Stoltz. Mirror descent meets fixed share (and feels no regret). In *Advances in Neural Information Processing Systems*, pages 980–988, 2012.
- [8] Zhao Chen, Jiquan Ngiam, Yanping Huang, Thang Luong, Henrik Kretschmar, Yuning Chai, and Dragomir Anguelov. Just pick a sign: Optimizing deep multitask models with gradient sign dropout. *Advances in Neural Information Processing Systems*, 2020.
- [9] Rémy Degenne, Thomas Nadelec, Clément Calauzènes, and Vianney Perchet. Bridging the gap between regret minimization and best arm identification, with application to a/b tests. In *The 22nd International Conference on Artificial Intelligence and Statistics*, pages 1988–1996, 2019.
- [10] Jean-Antoine Désidéri. Multiple-gradient descent algorithm for multiobjective optimization. *Comptes Rendus Mathématique*, 350(5-6):313–318, 2012.
- [11] Dheeru Dua and Casey Graff. UCI machine learning repository, 2017.
- [12] Michael TM Emmerich and André H Deutz. A tutorial on multiobjective optimization: Fundamentals and evolutionary methods. *Natural Computing*, 17(3):585–609, 2018.
- [13] Elad Hazan et al. Introduction to online convex optimization. *Foundations and Trends® in Optimization*, 2(3-4):157–325, 2016.
- [14] Martin Jaggi. Revisiting Frank-Wolfe: Projection-free sparse convex optimization. In *International Conference on Machine Learning*, pages 427–435, 2013.
- [15] Adrián Javaloy and Isabel Valera. Rotograd: Gradient homogenization in multitask learning. *arXiv preprint arXiv:2103.02631*, 2021.
- [16] Wouter Koolen. The pareto regret frontier. *Advances in Neural Information Processing Systems*, pages 1–9, 2013.
- [17] Wouter M Koolen and Tim Van Erven. Second-order quantile methods for experts and combinatorial games. In *Conference on Learning Theory*, pages 1155–1175, 2015.
- [18] Xi Lin, Hui-Ling Zhen, Zhenhua Li, Qing-Fu Zhang, and Sam Kwong. Pareto multi-task learning. In *Advances in Neural Information Processing Systems*, pages 12060–12070, 2019.



- 663 [19] Bo Liu, Xingchao Liu, Xiaojie Jin, Peter Stone, and Qiang Liu. Conflict-averse gradient descent  
664 for multi-task learning. *arXiv preprint arXiv:2110.14048*, 2021.
- 665 [20] Shiyin Lu, Guanghui Wang, Yao Hu, and Lijun Zhang. Multi-objective generalized linear  
666 bandits. In *International Joint Conference on Artificial Intelligence*, pages 3080–3086, 2019.
- 667 [21] Shie Mannor, Vianney Perchet, and Gilles Stoltz. Approachability in unknown games: Online  
668 learning meets multi-objective optimization. In *Annual Conference on Learning Theory*, pages  
669 339–355, 2014.
- 670 [22] Brendan McMahan and Matthew Streeter. Delay-tolerant algorithms for asynchronous dis-  
671 tributed online learning. *Advances in Neural Information Processing Systems*, 27, 2014.
- 672 [23] Francesco Orabona. A modern introduction to online learning. *arXiv preprint arXiv:1912.13213*,  
673 2019.
- 674 [24] Sasha Rakhlin and Karthik Sridharan. Optimization, learning, and games with predictable  
675 sequences. In *Advances in Neural Information Processing Systems*, pages 3066–3074, 2013.
- 676 [25] Sashank J Reddi, Satyen Kale, and Sanjiv Kumar. On the convergence of Adam and beyond. In  
677 *International Conference on Learning Representations*, 2018.
- 678 [26] Sara Sabour, Nicholas Frosst, and Geoffrey E Hinton. Dynamic routing between capsules. In  
679 *Advances in Neural Information Processing Systems*, pages 3859–3869, 2017.
- 680 [27] Ozan Sener and Vladlen Koltun. Multi-task learning as multi-objective optimization. In  
681 *Advances in Neural Information Processing Systems*, pages 525–536, 2018.
- 682 [28] Nati Srebro, Karthik Sridharan, and Ambuj Tewari. On the universality of online mirror descent.  
683 In *Advances in Neural Information Processing Systems*, pages 2645–2653, 2011.
- 684 [29] Cem Tekin and Eralp Turgay. Multi-objective contextual multi-armed bandit with a dominant  
685 objective. *IEEE Transactions on Signal Processing*, 66(14):3799–3813, 2018.
- 686 [30] Eralp Turgay, Doruk Oner, and Cem Tekin. Multi-objective contextual bandit problem with  
687 similarity information. In *International Conference on Artificial Intelligence and Statistics*,  
688 pages 1673–1681, 2018.
- 689 [31] Tianbao Yang, Lijun Zhang, Rong Jin, and Jinfeng Yi. Tracking slowly moving clairvoyant:  
690 Optimal dynamic regret of online learning with true and noisy gradient. In *International*  
691 *Conference on Machine Learning*, pages 449–457, 2016.
- 692 [32] Tianhe Yu, Saurabh Kumar, Abhishek Gupta, Sergey Levine, Karol Hausman, and Chelsea  
693 Finn. Gradient surgery for multi-task learning. In *Advances in Neural Information Processing*  
694 *Systems*, pages 5824–5836, 2020.
- 695 [33] Lijun Zhang, Tianbao Yang, Zhi-Hua Zhou, et al. Dynamic regret of strongly adaptive methods.  
696 In *International Conference on Machine Learning*, pages 5882–5891, 2018.
- 697 [34] Peng Zhao, Yu-Jie Zhang, Lijun Zhang, and Zhi-Hua Zhou. Dynamic regret of convex and  
698 smooth functions. *Advances in Neural Information Processing Systems*, 33:12510–12520, 2020.
